# Supplementary material for: Isorhamnetin inhibits hypertrophic scar formation through TGF-β1/Smad and TGF-β1/CREB3L1 signaling pathways
Source: PubMed Central journal article supplement — Heliyon. 2024 Jun 29;10(13):e33802. doi: 10.1016/j.heliyon.2024.e33802 (PMC11269880; doi:10.1016/j.heliyon.2024.e33802), 2024-06-29

**Figure 2. ISO promoted HSFBs apoptosis and induced cell cycle arrest**

B. The expressions of apoptotic proteins in HSFBs and quantification of the apoptotic protein levels normalized to GAPDH.

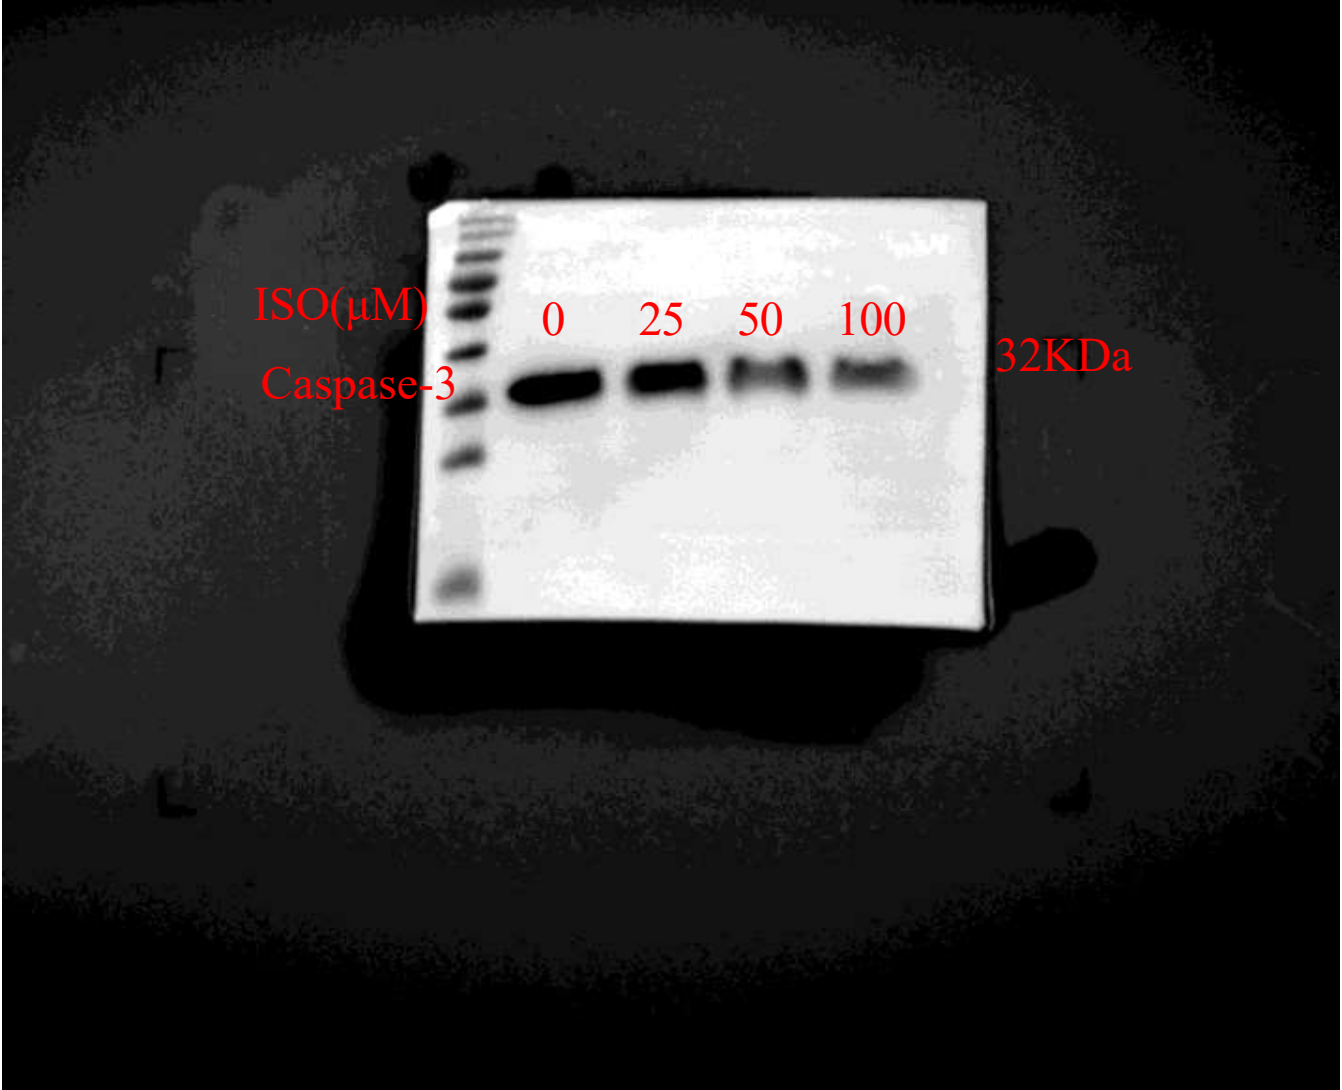

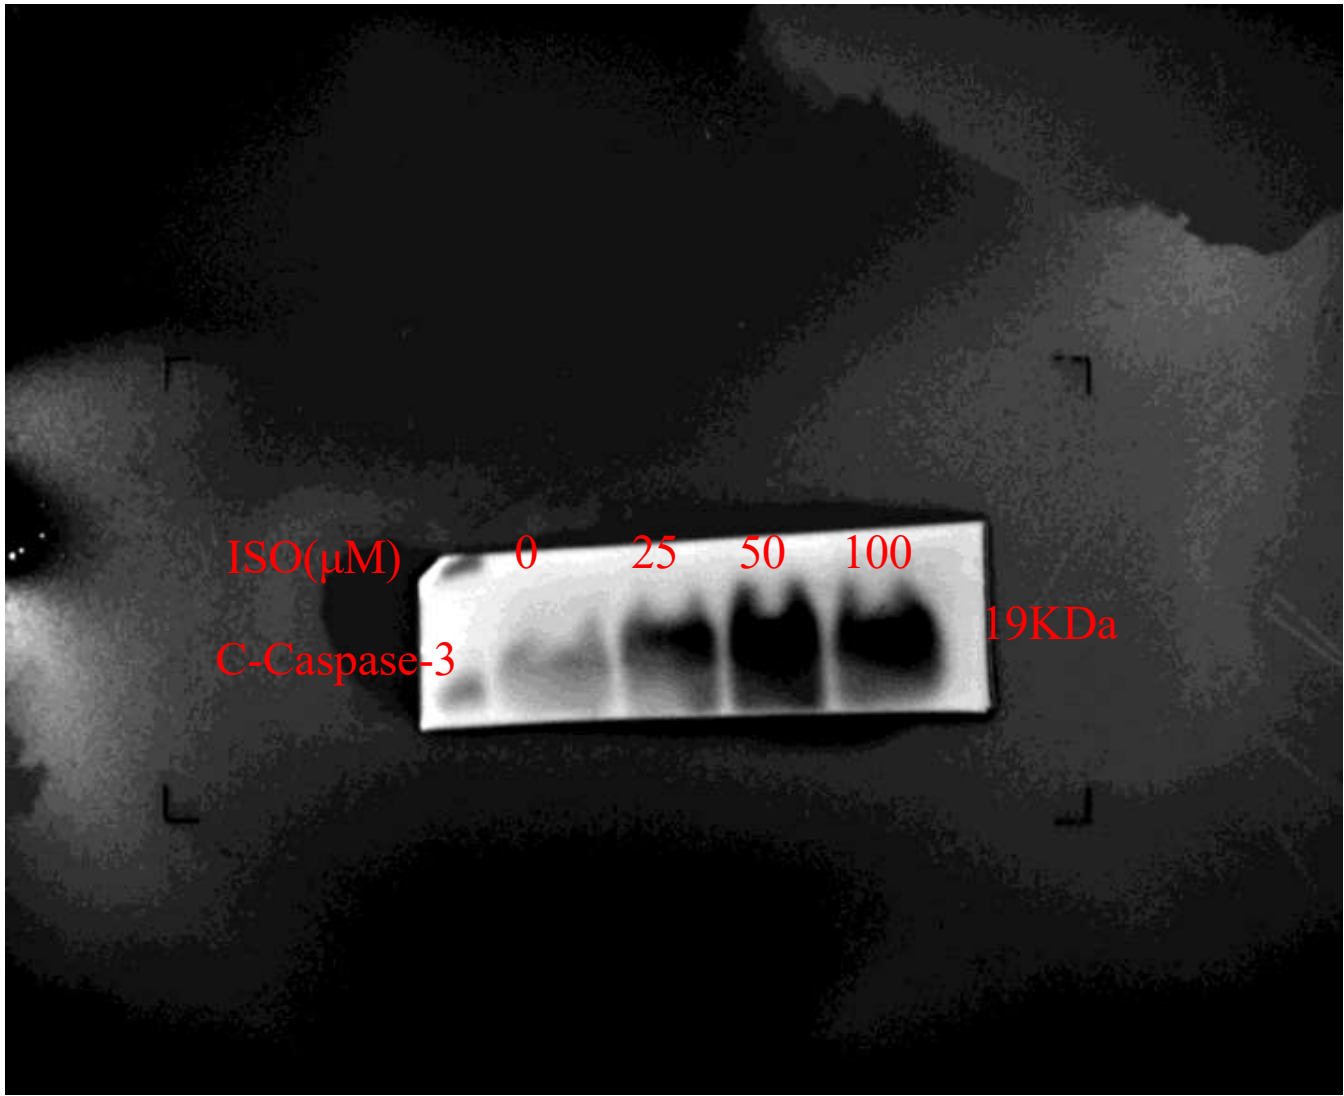

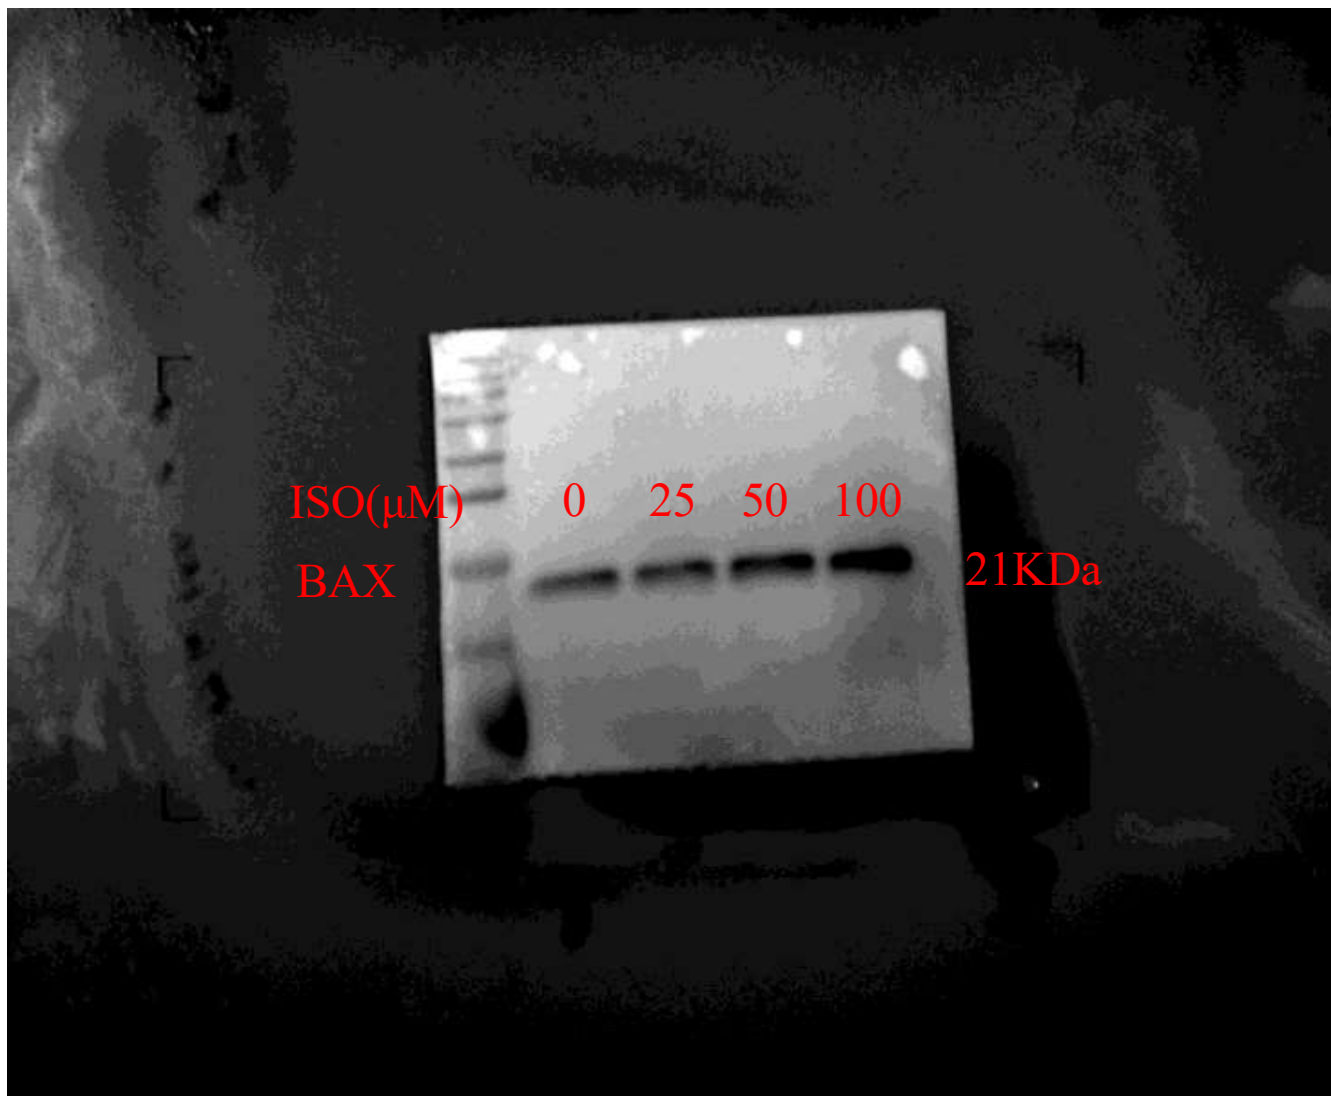

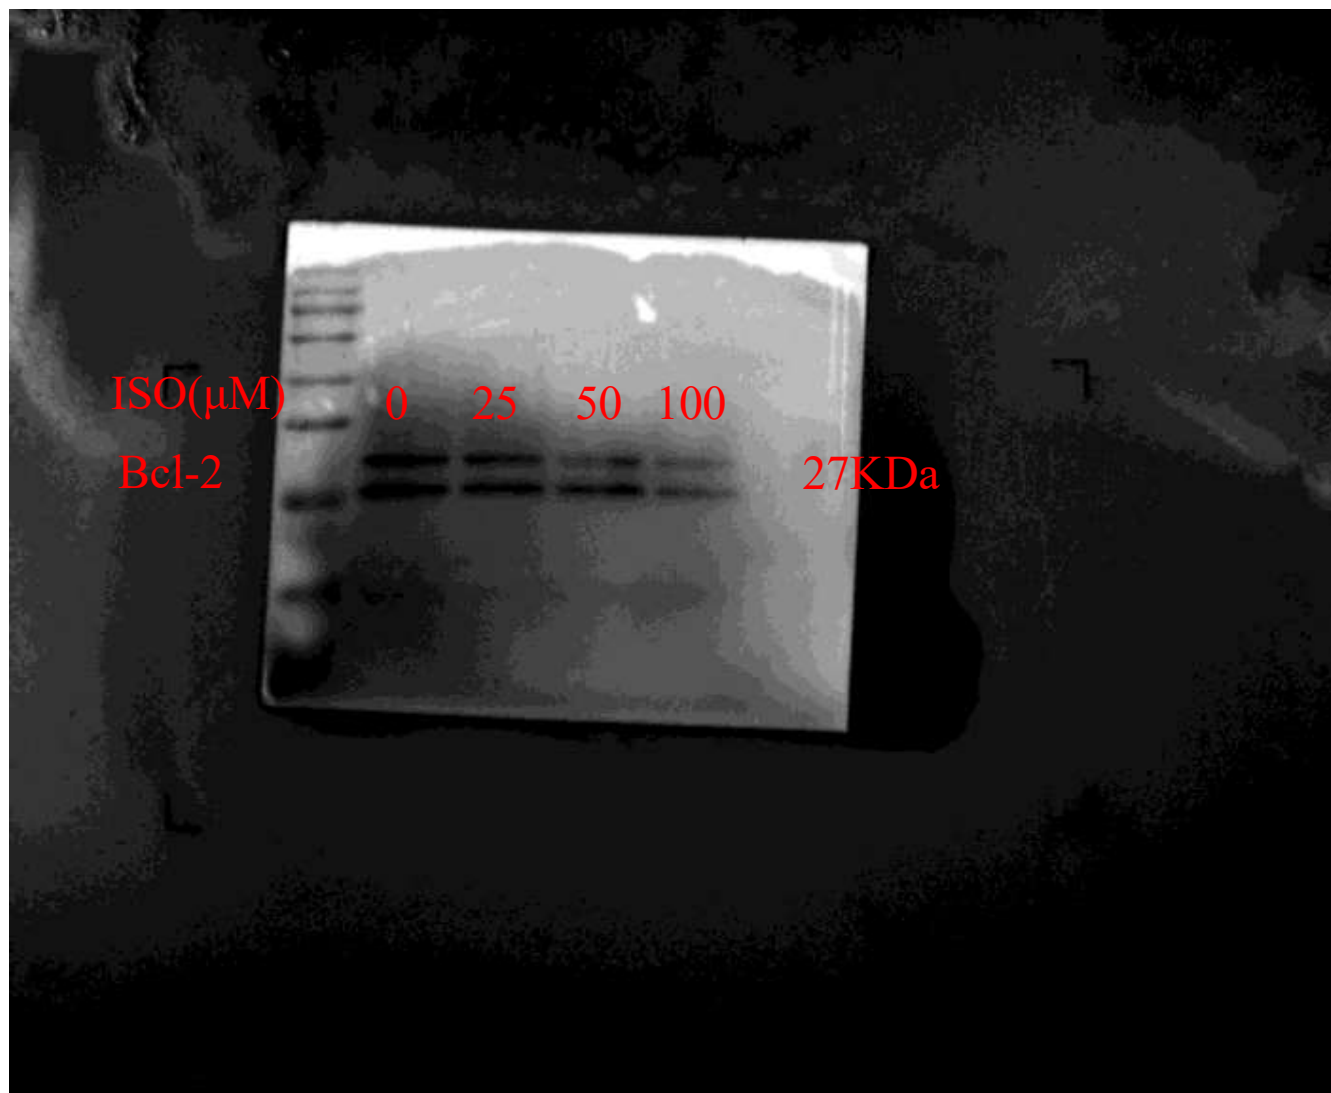

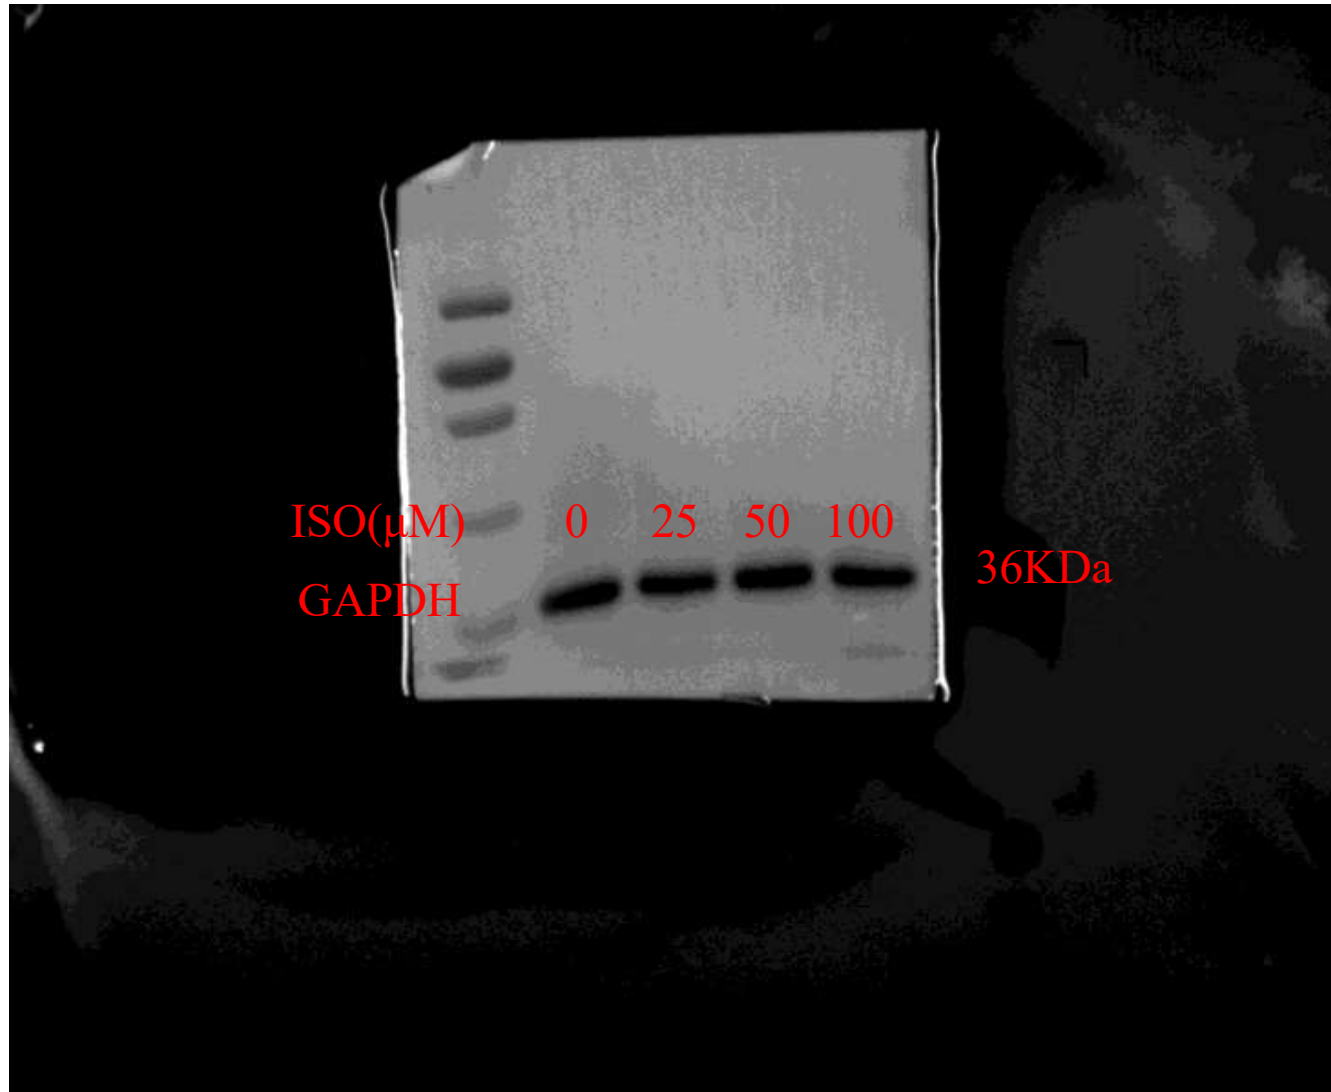

**Figure 3. ISO suppressed HSF1Bs migration.**

E. Western blotting and quantification of MMP2 and MMP9 normalized to GAPDH.

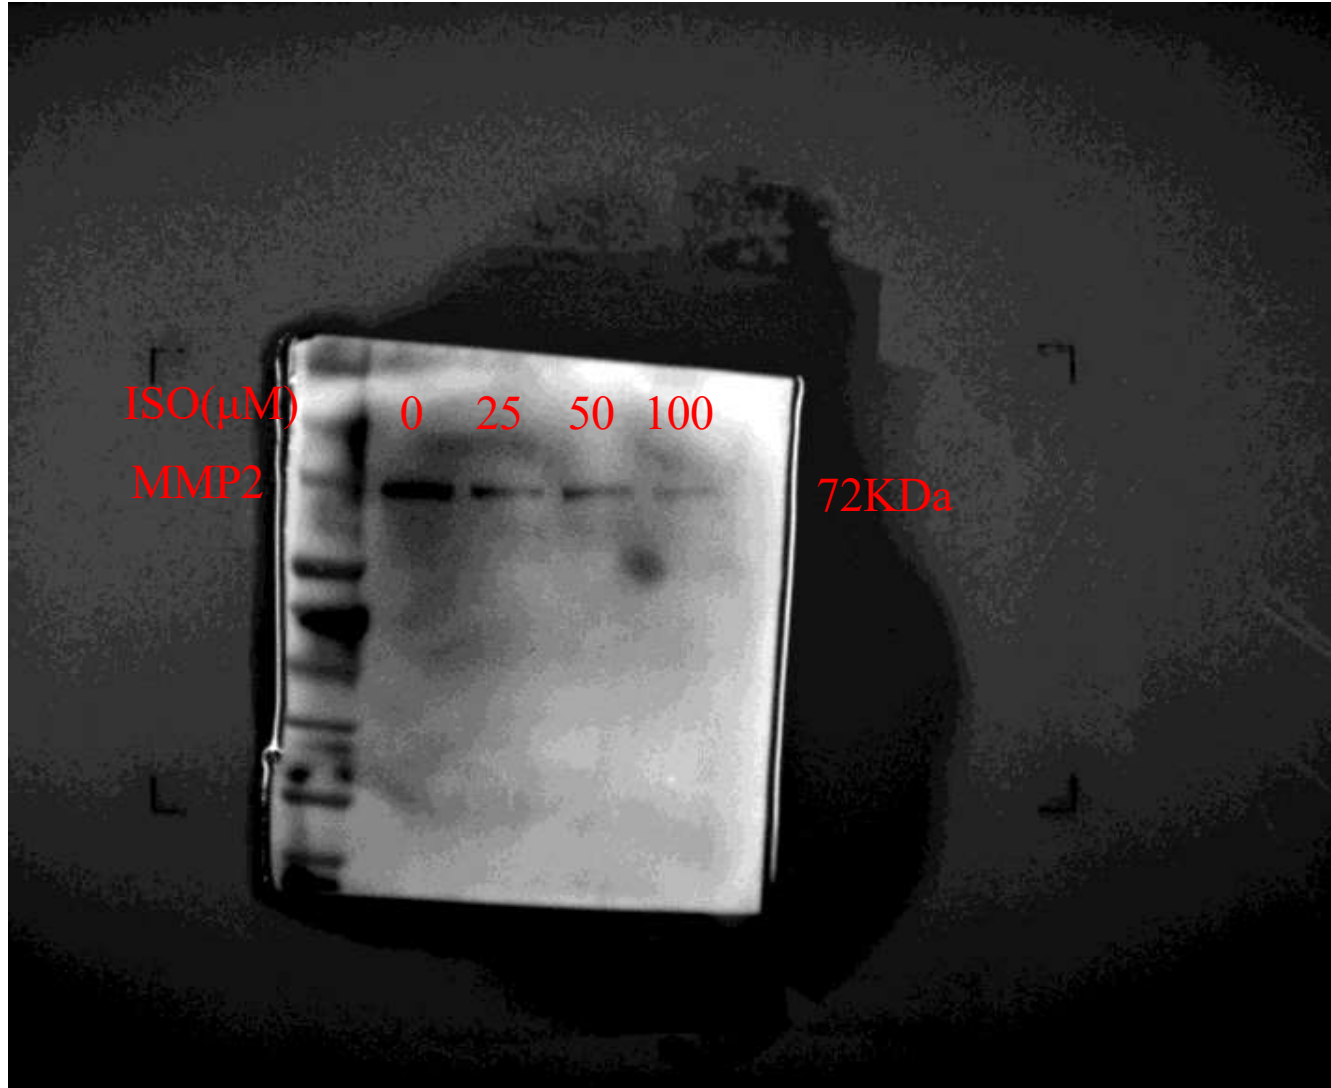

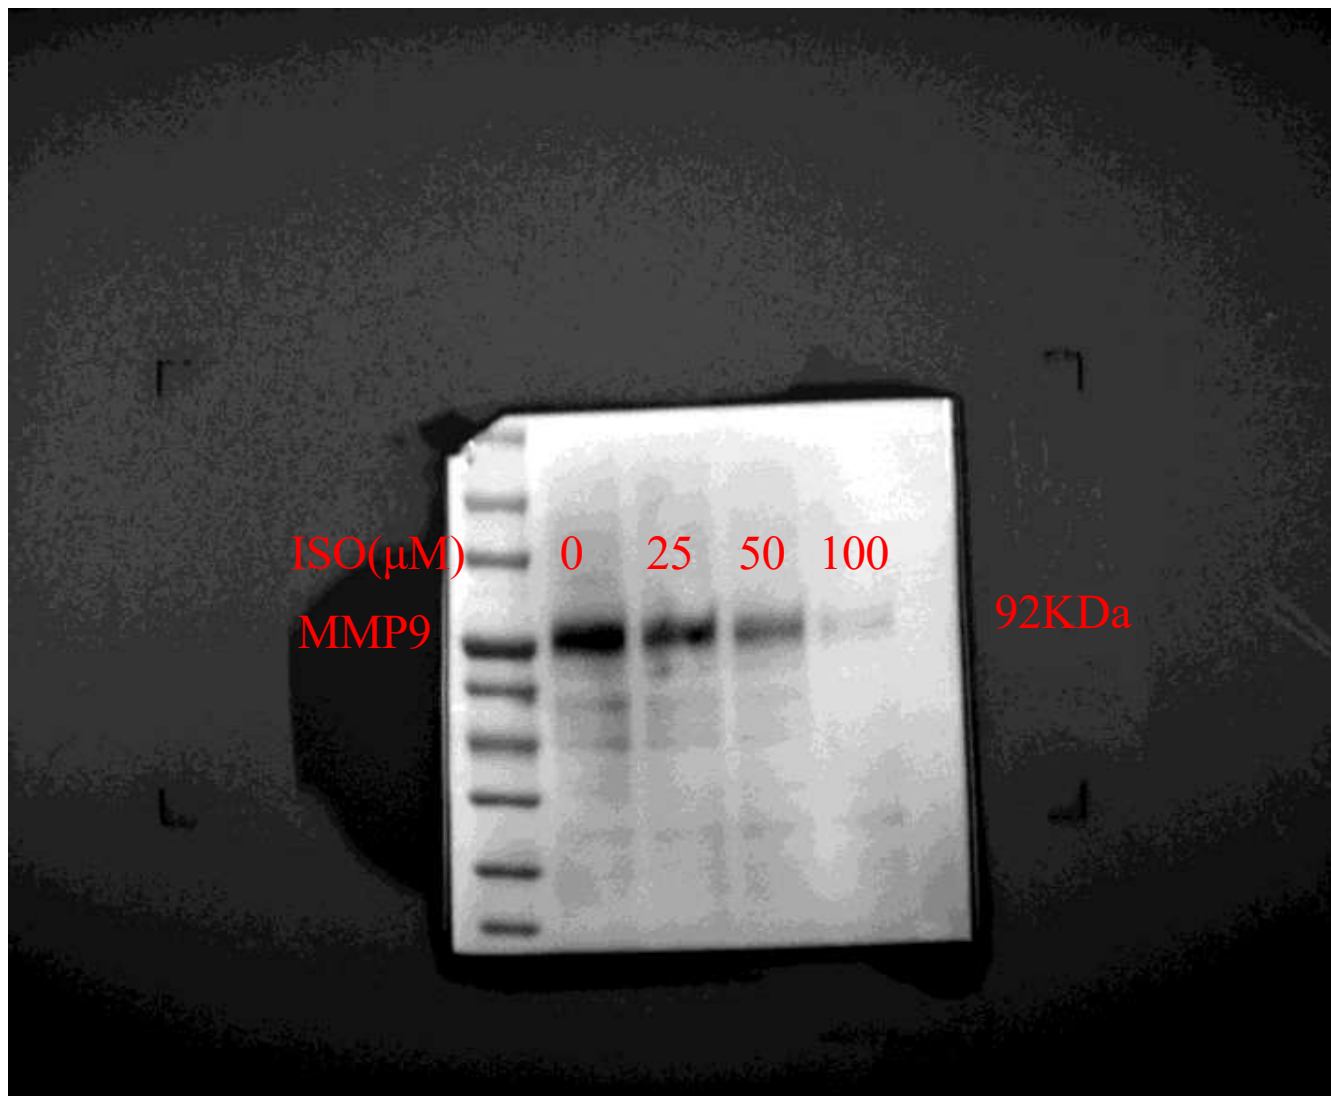

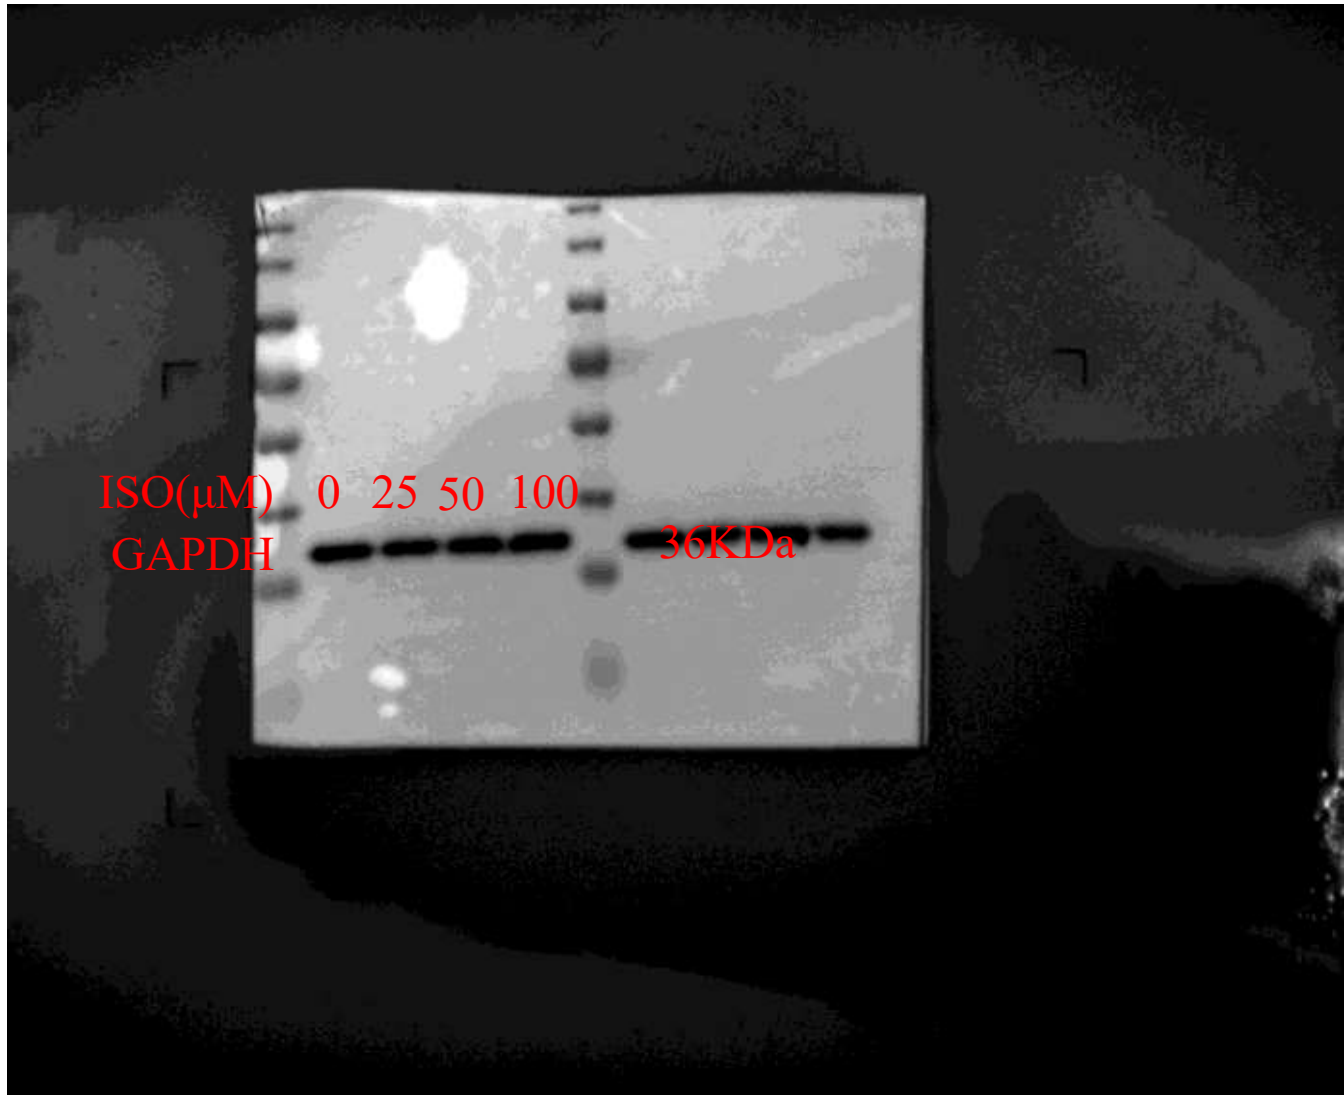



**Figure 4. ISO inhibited the gel contraction, myofibroblast activation, and collagen expression.**

C. Western blotting results of  $\alpha$ -SMA in HSFs and TGF- $\beta$ 1-stimulated NFBs after treatment with ISO (0, 25, 50, 100  $\mu$ M) for 48 h and the quantification of the protein levels normalized to GAPDH.

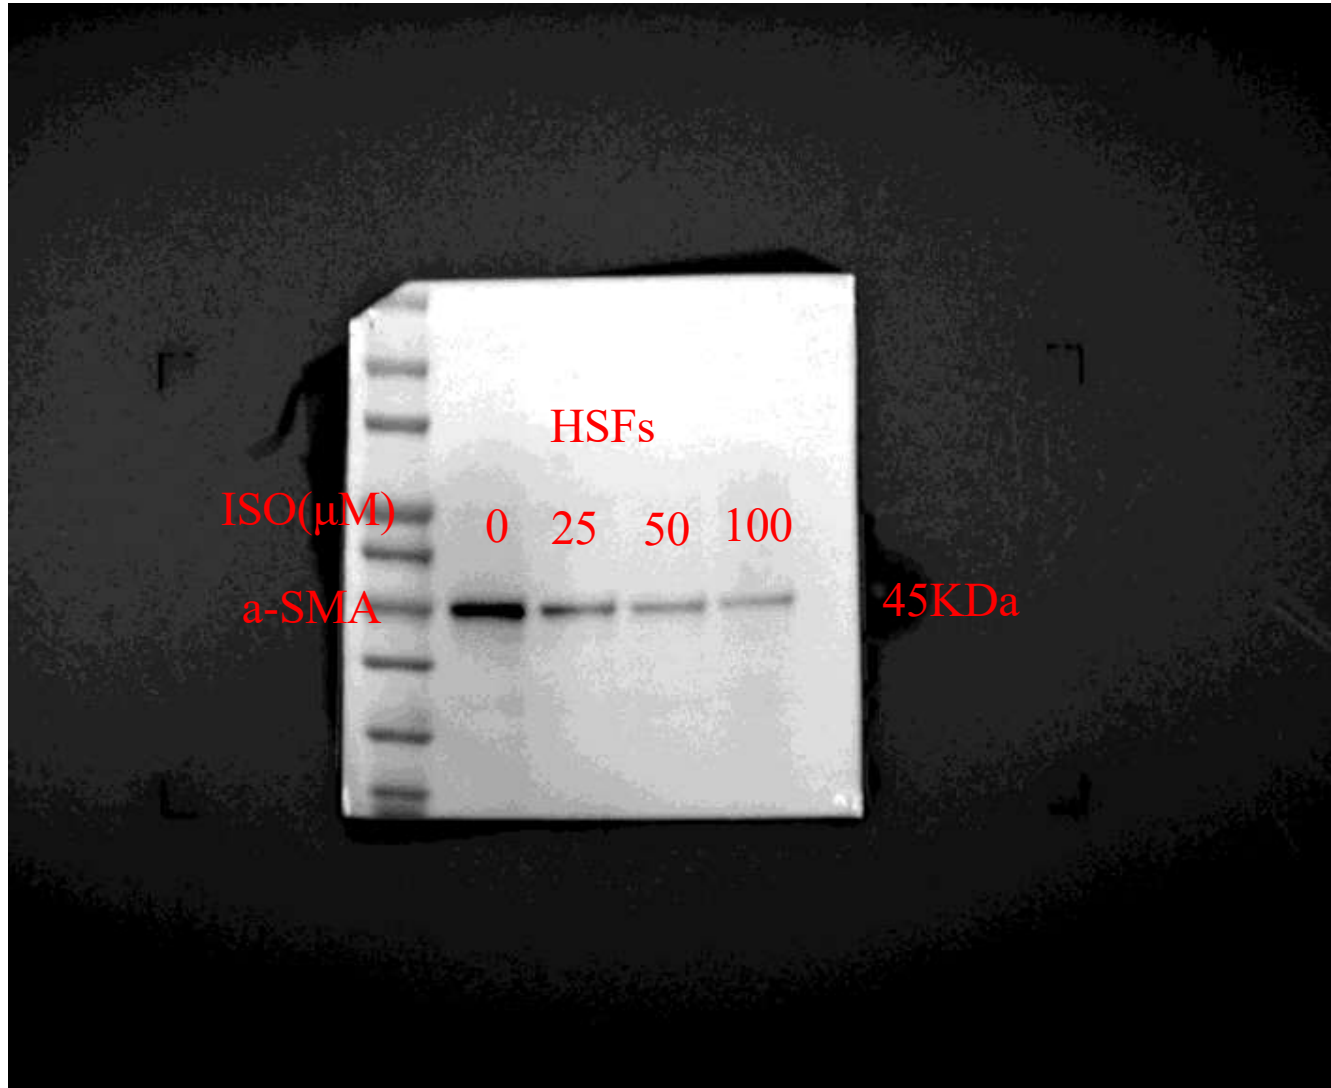

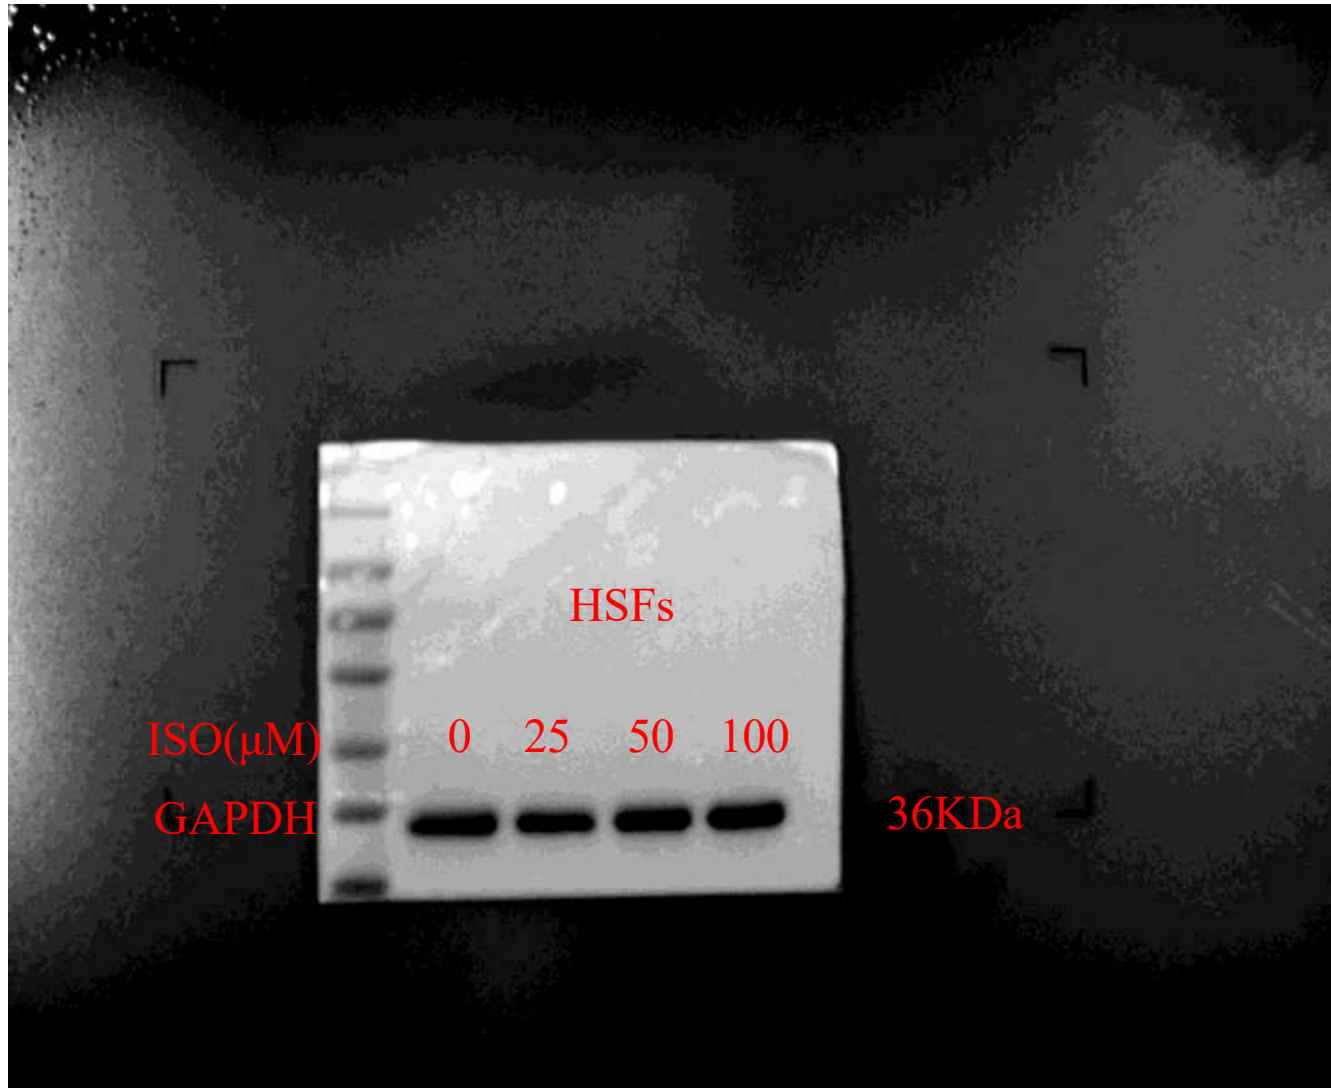

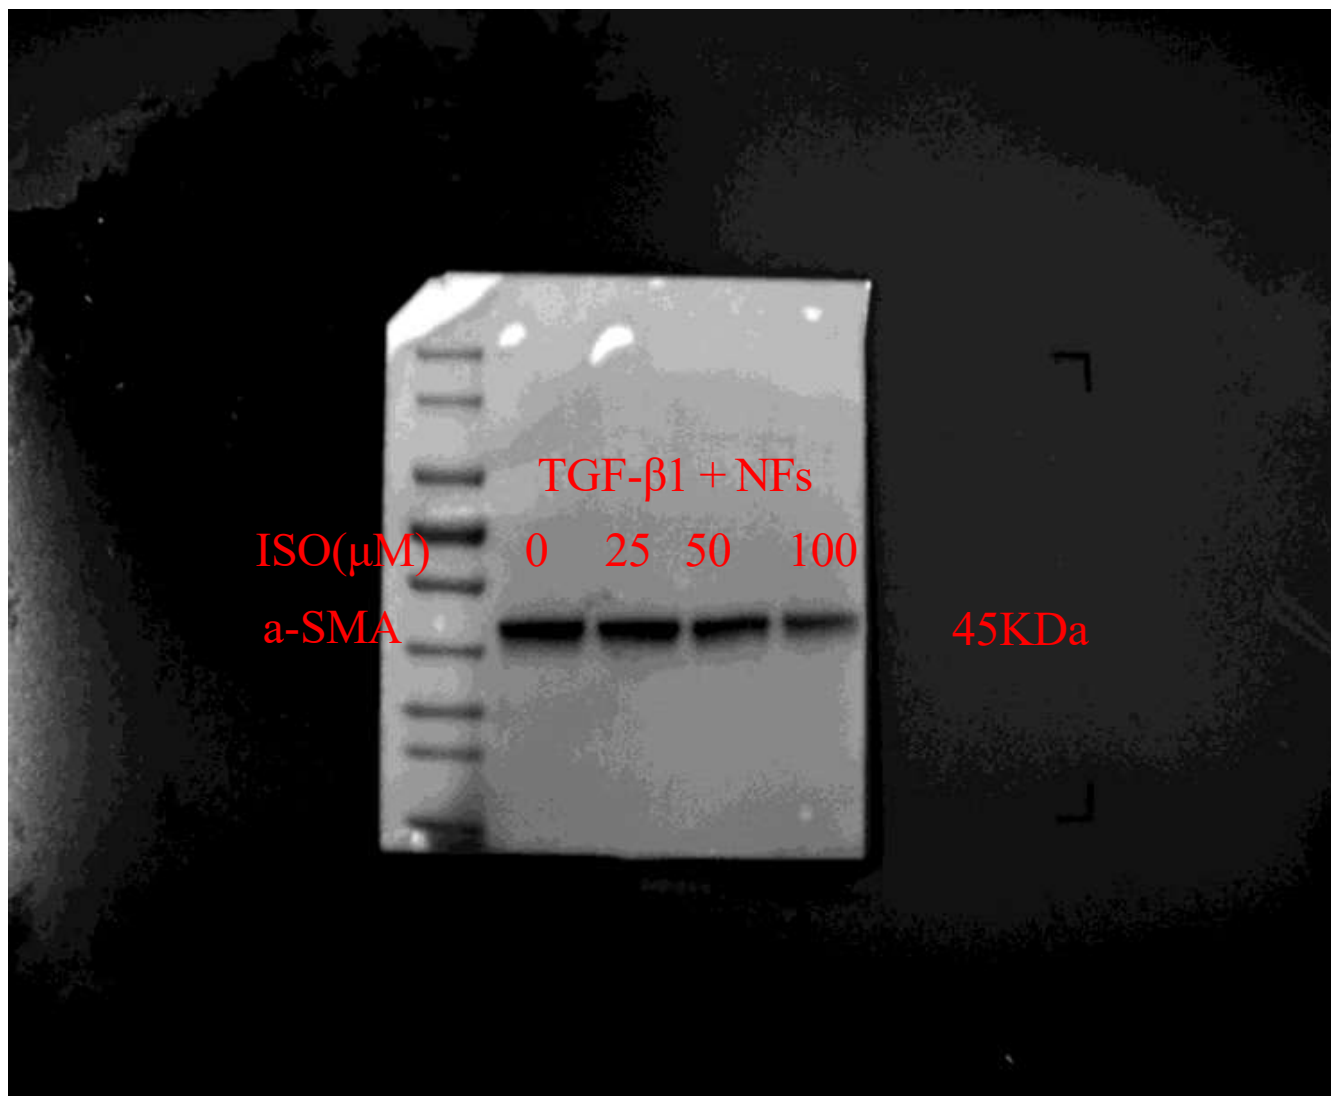

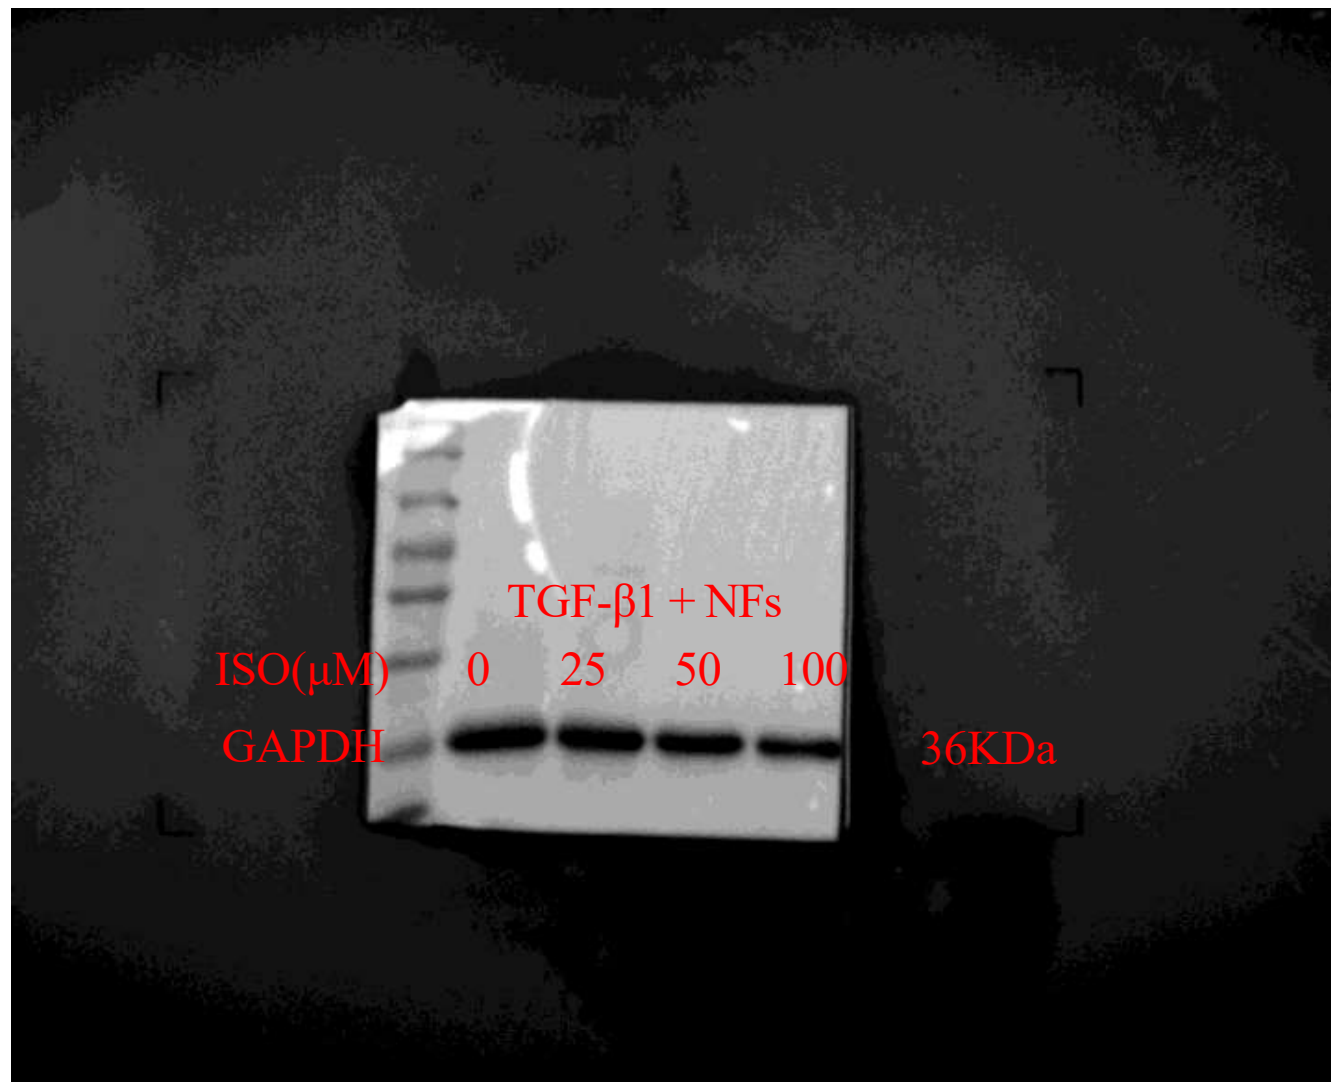

D. Western blotting results of COL I and COL III in HSFBs and the quantification of COL I and COL III normalized to GAPDH.

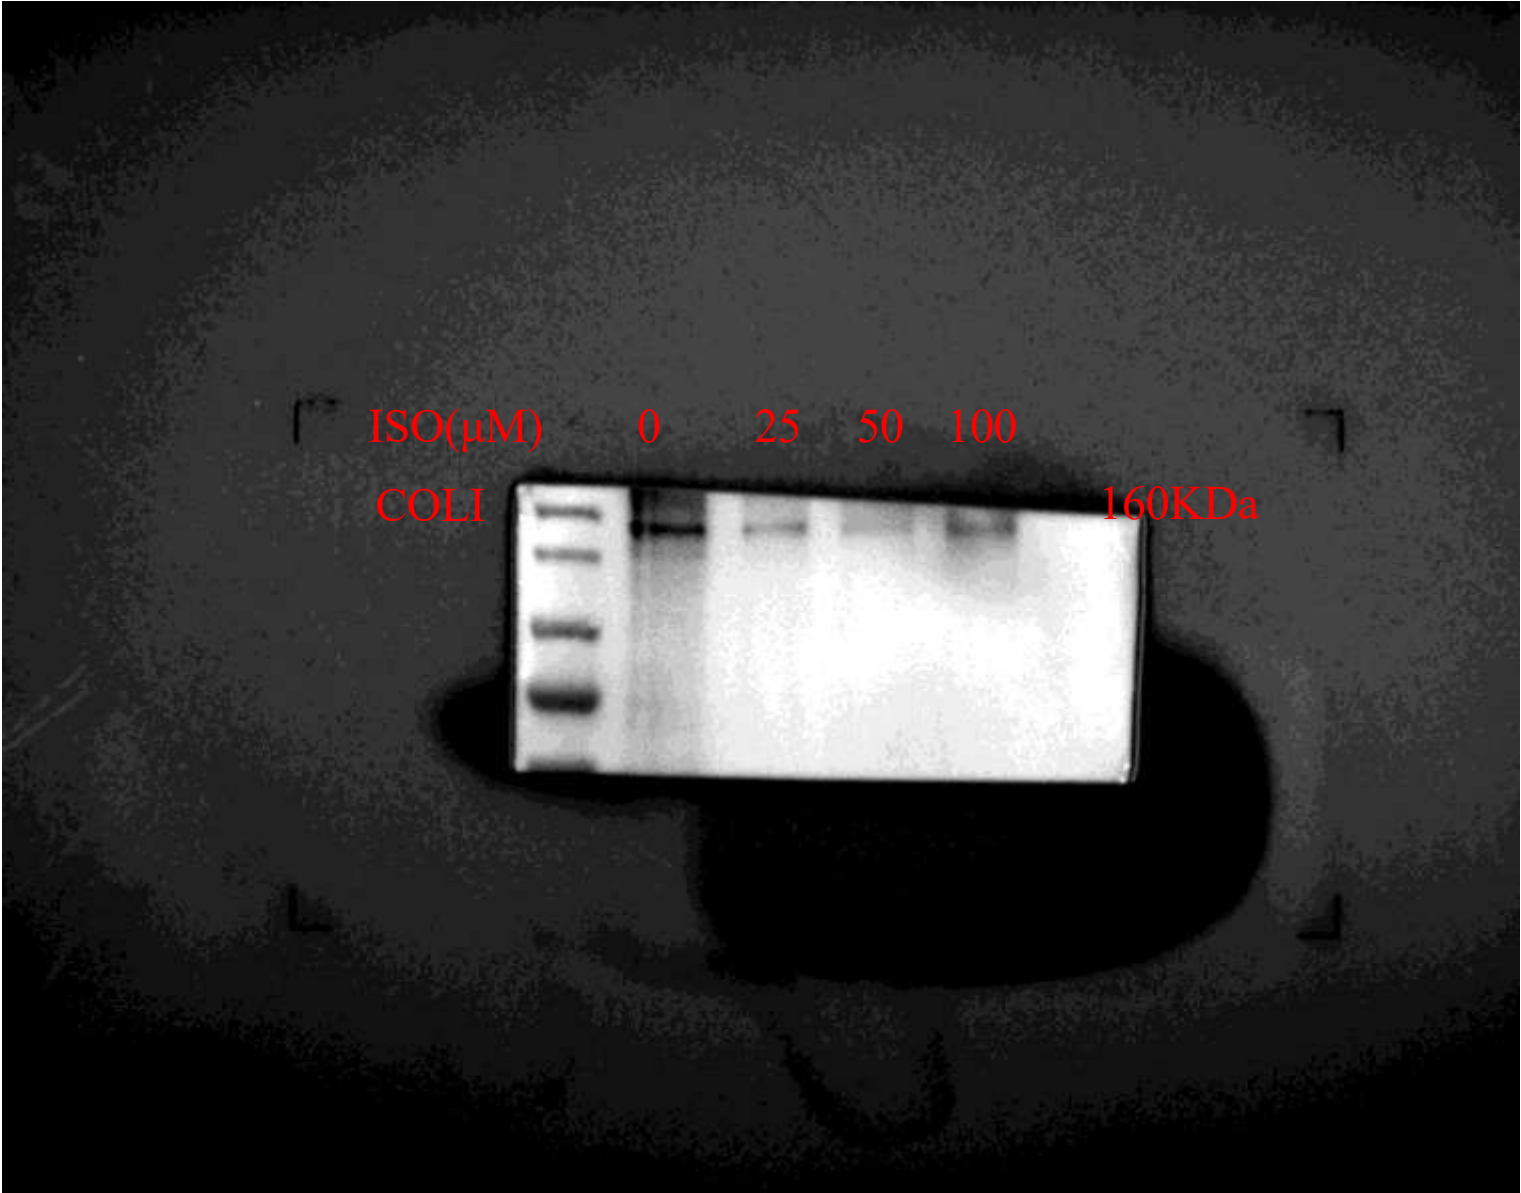

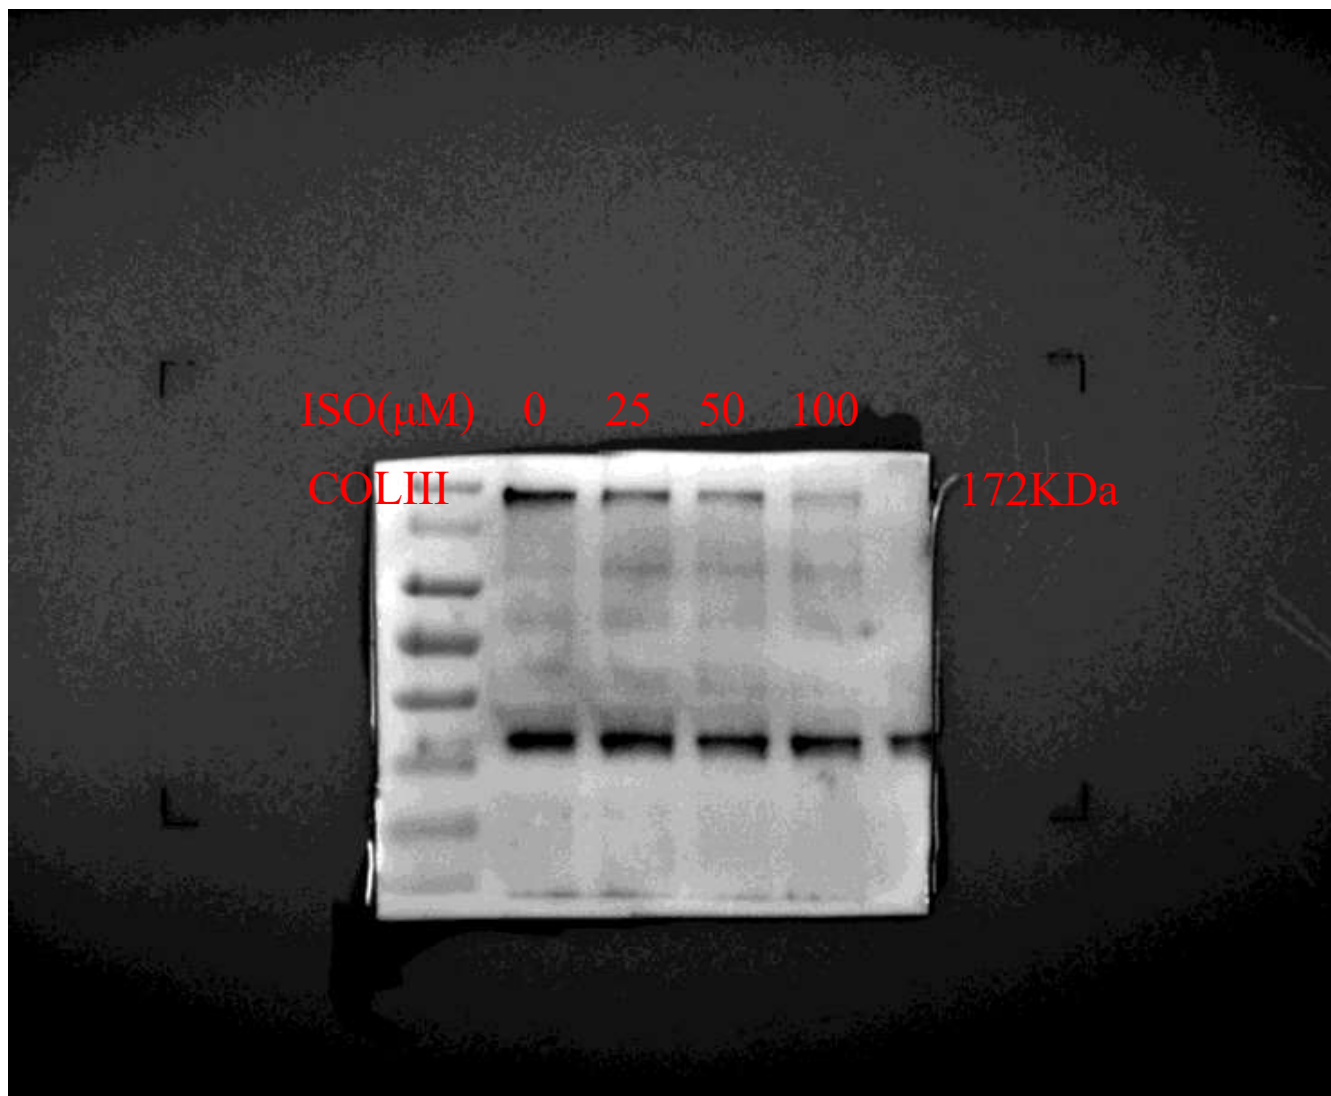

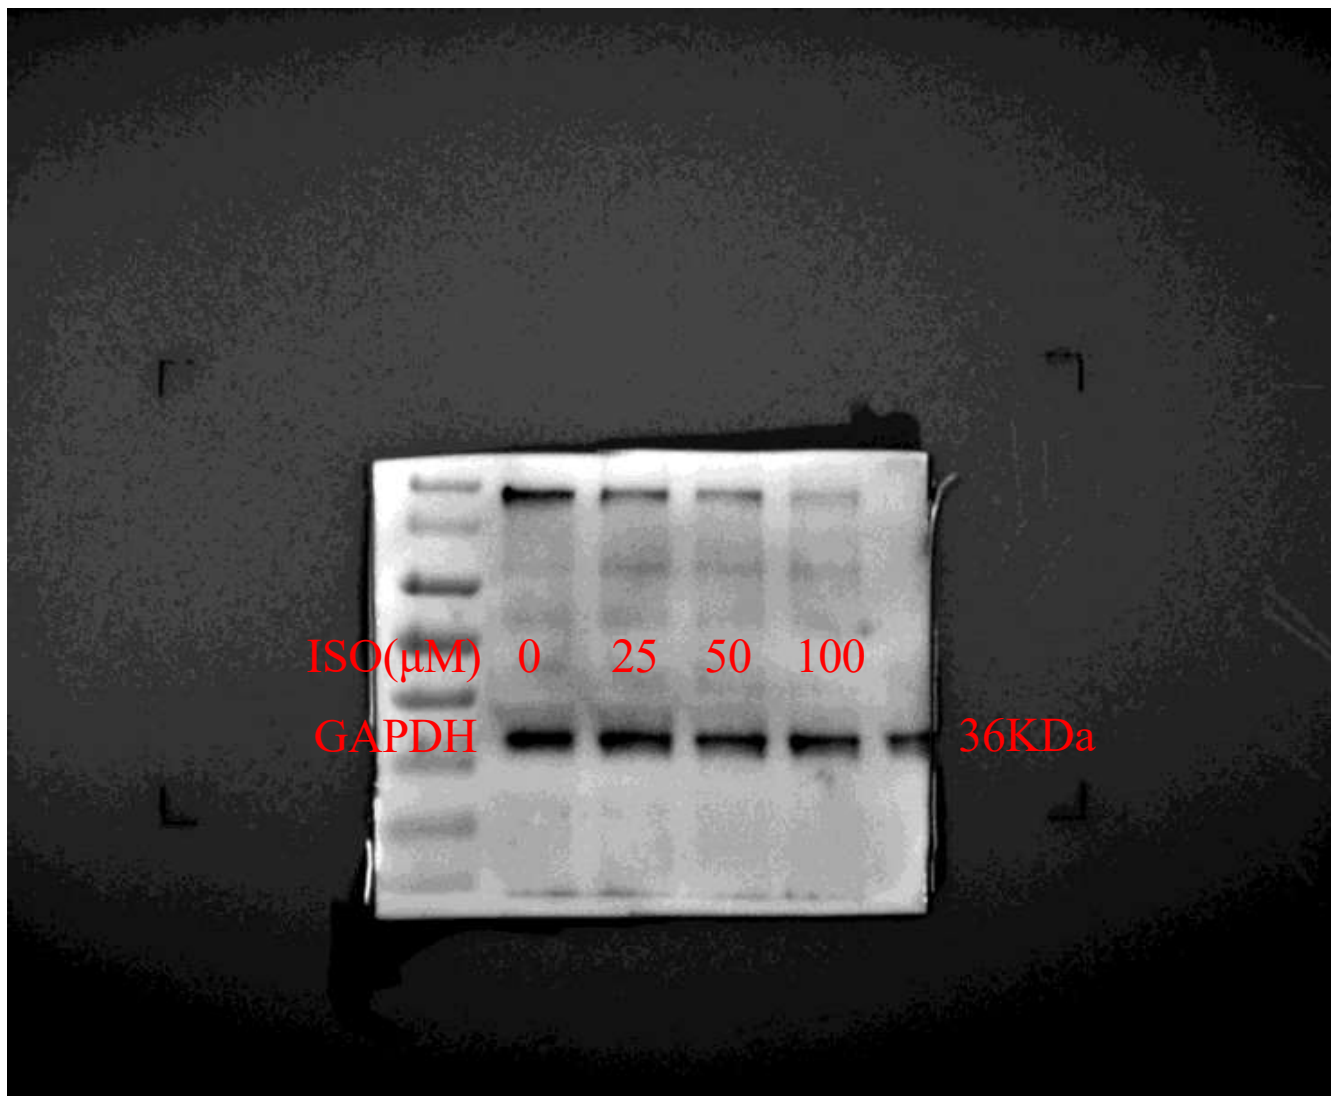

**Figure 5. ISO inhibited ECM production by suppressing the TGF- $\beta$ 1/Smad signaling pathway**

D. The protein levels of TGF- $\beta$ 1, phosphorylated Smad2 and Smad3, and total Smad2 and Smad3 detected by Western blotting and the quantification of protein levels normalized to GAPDH

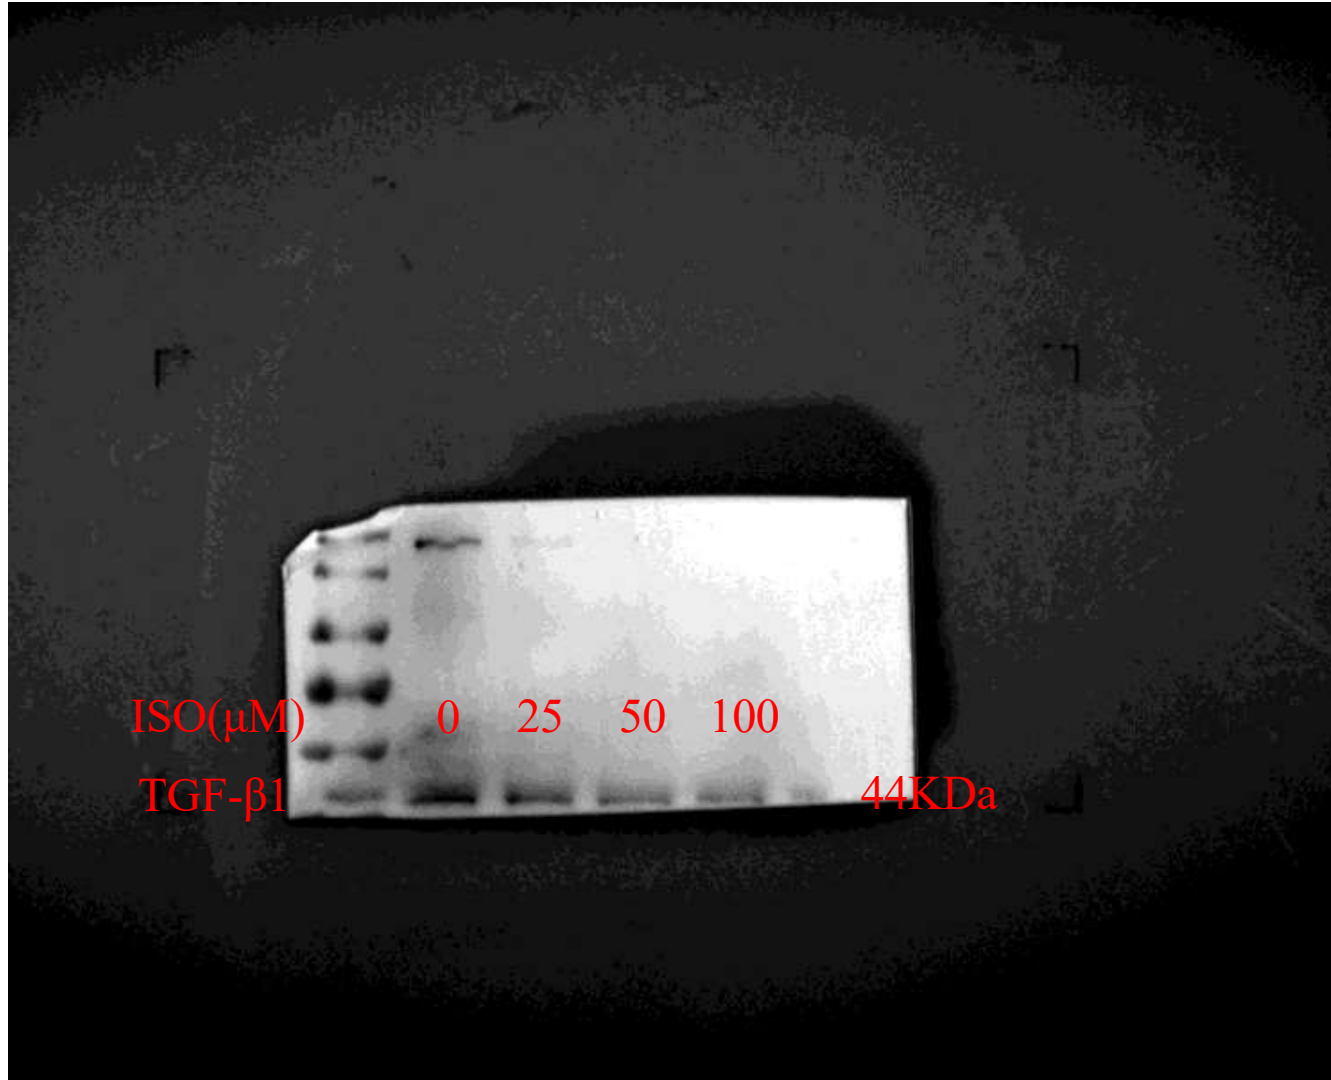



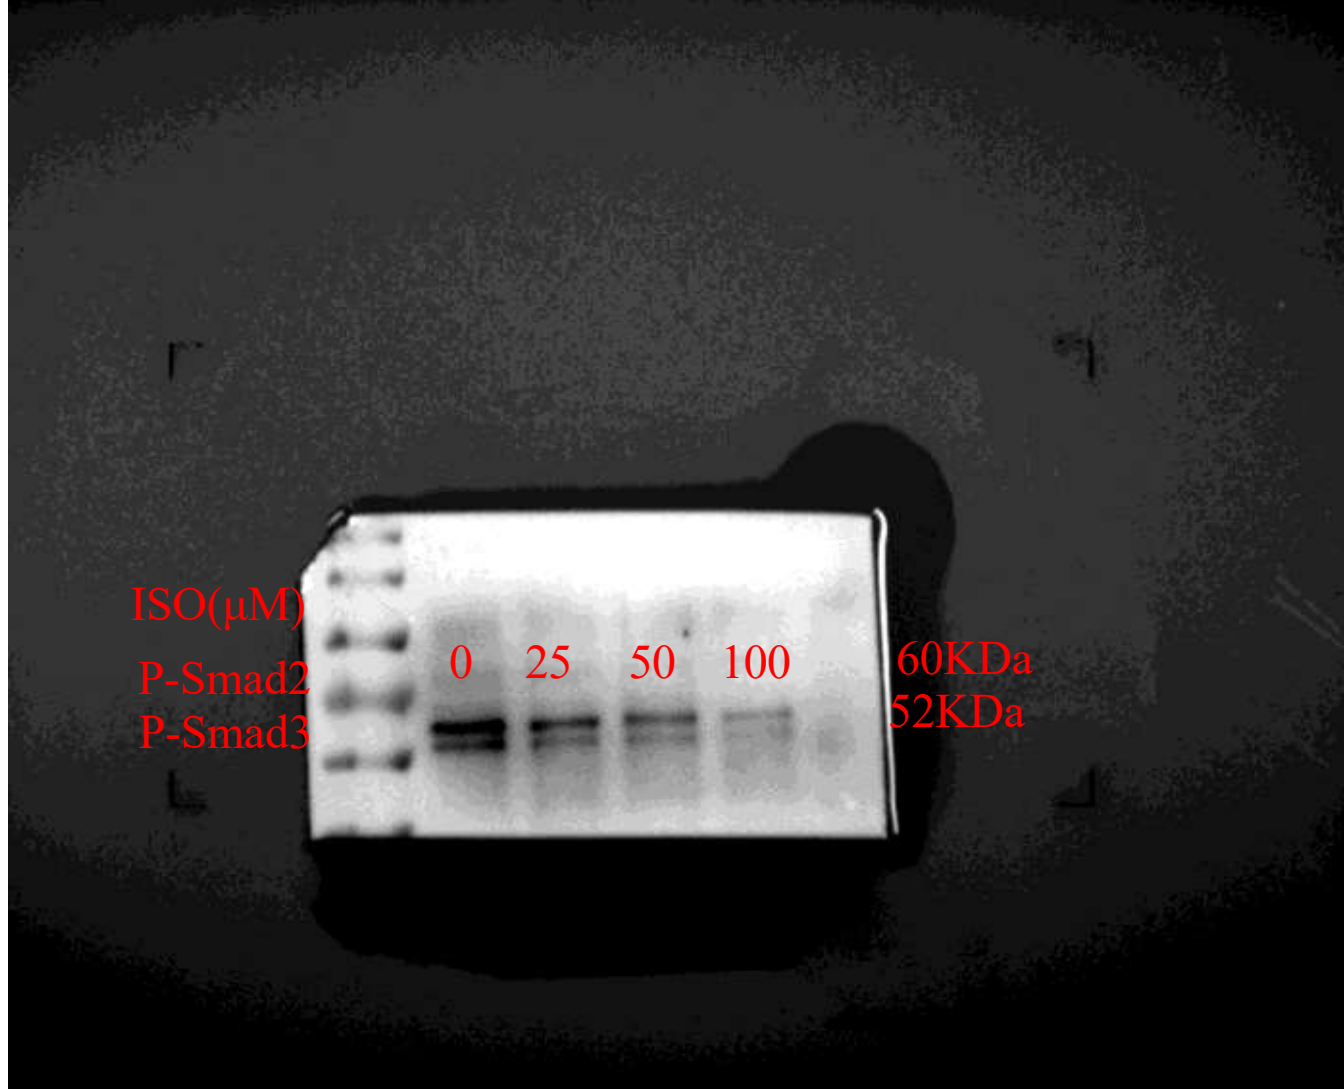

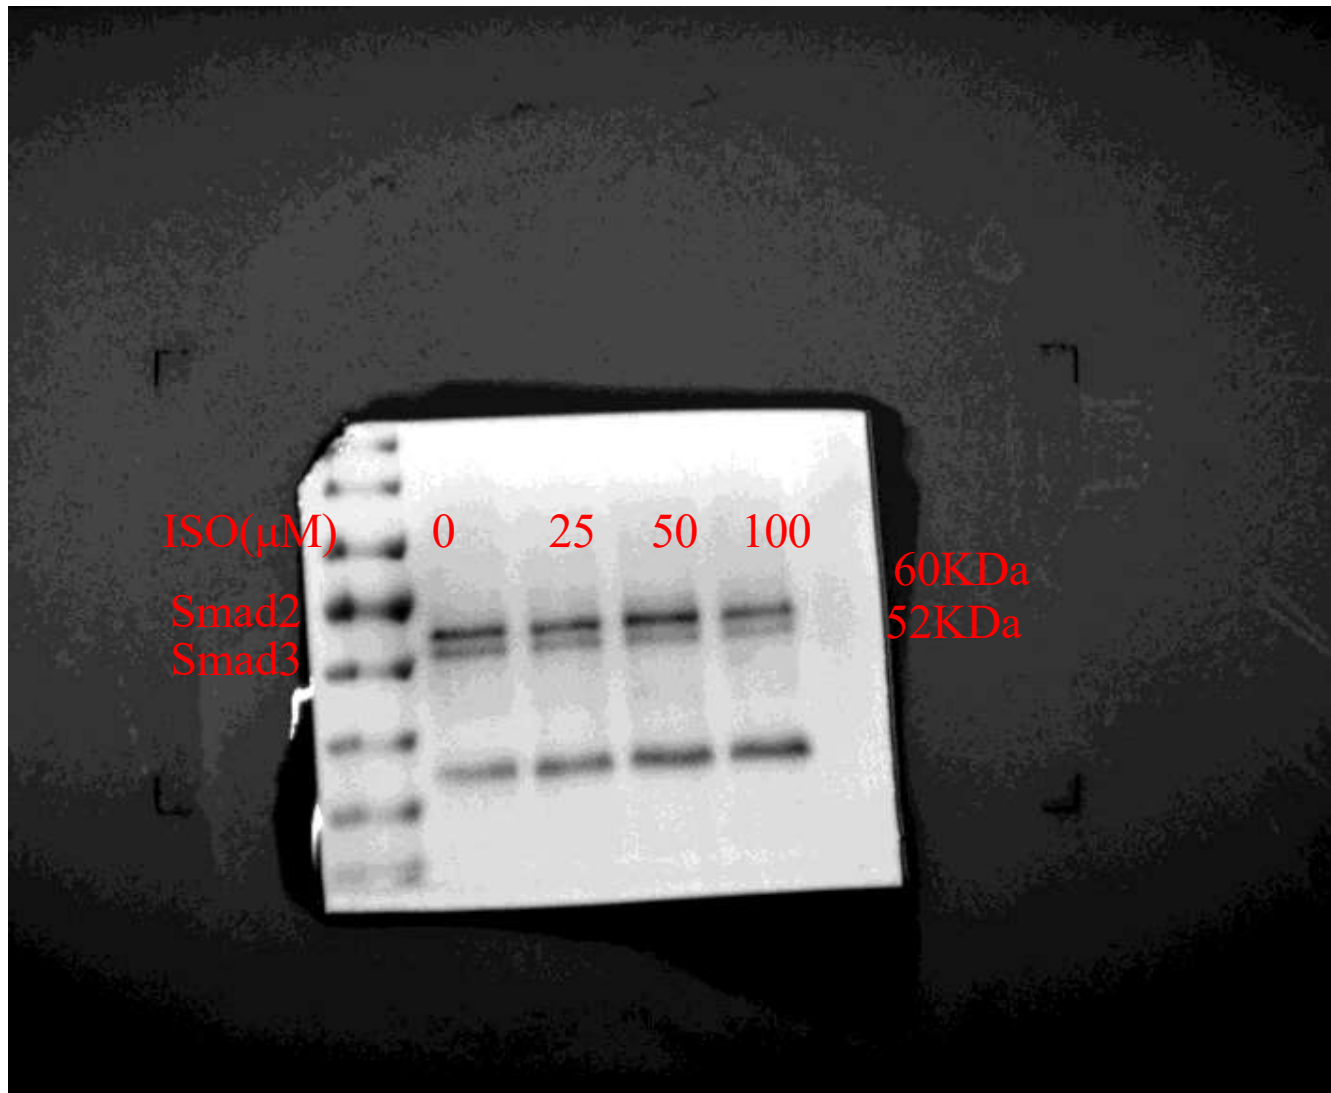

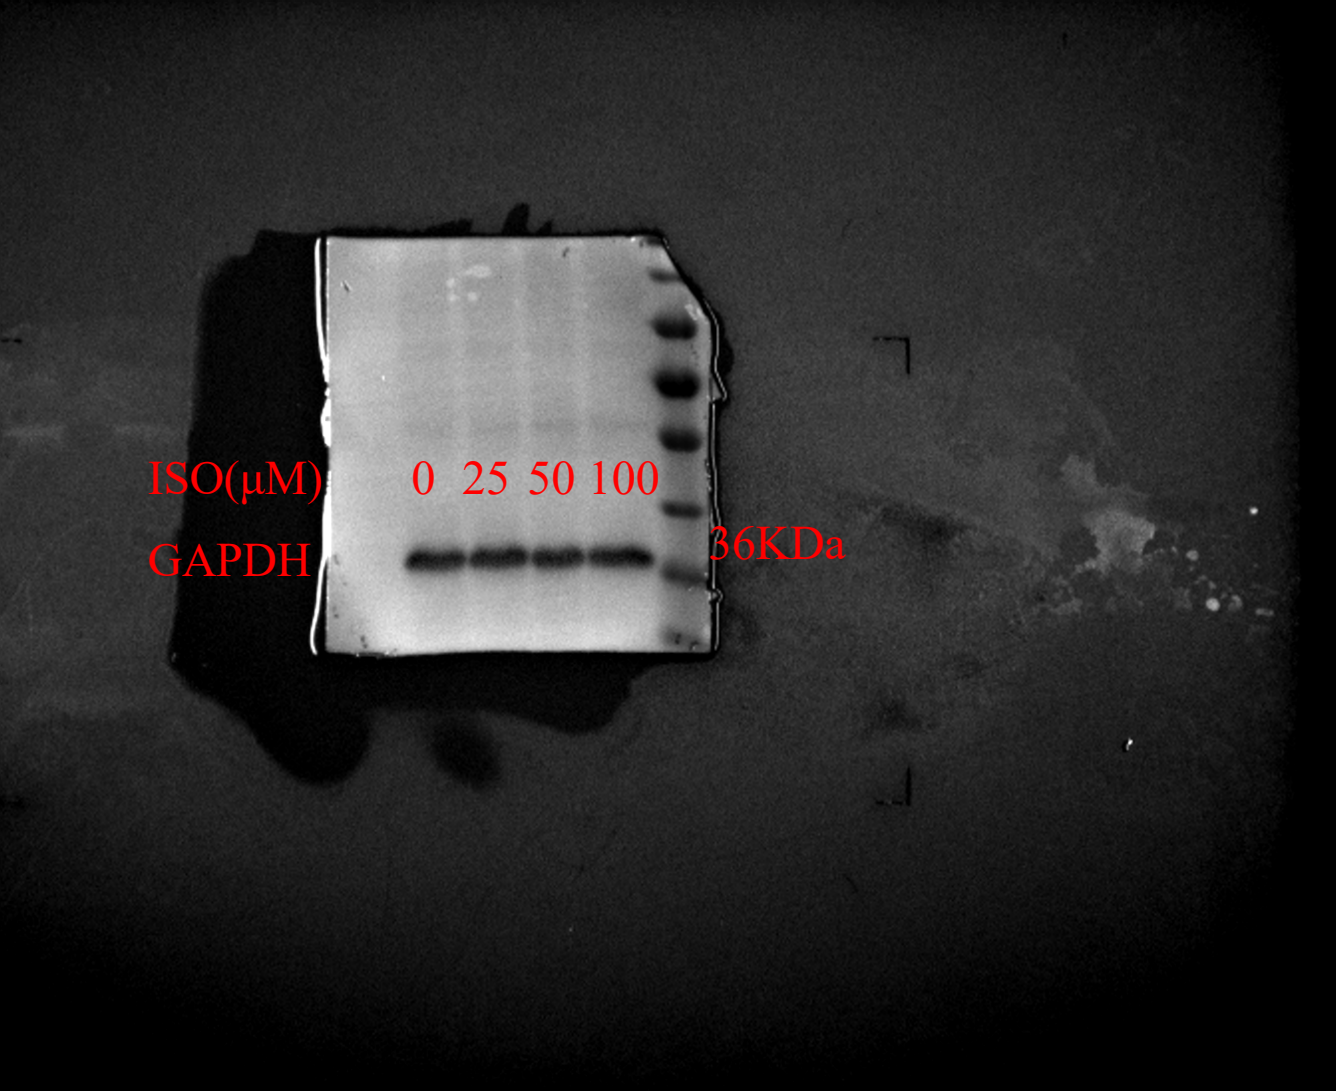

E. The protein levels of phosphorylated and total Smad2/3, COL I, COL III, and  $\alpha$ -SMA assessed by Western blotting in HSFBs after treatment with ISO (0, 25, 50, 100  $\mu$ M) + TGF- $\beta$ 1 (0, 10 ng/mL) for 48 h and the quantification of protein levels normalized to GAPDH.

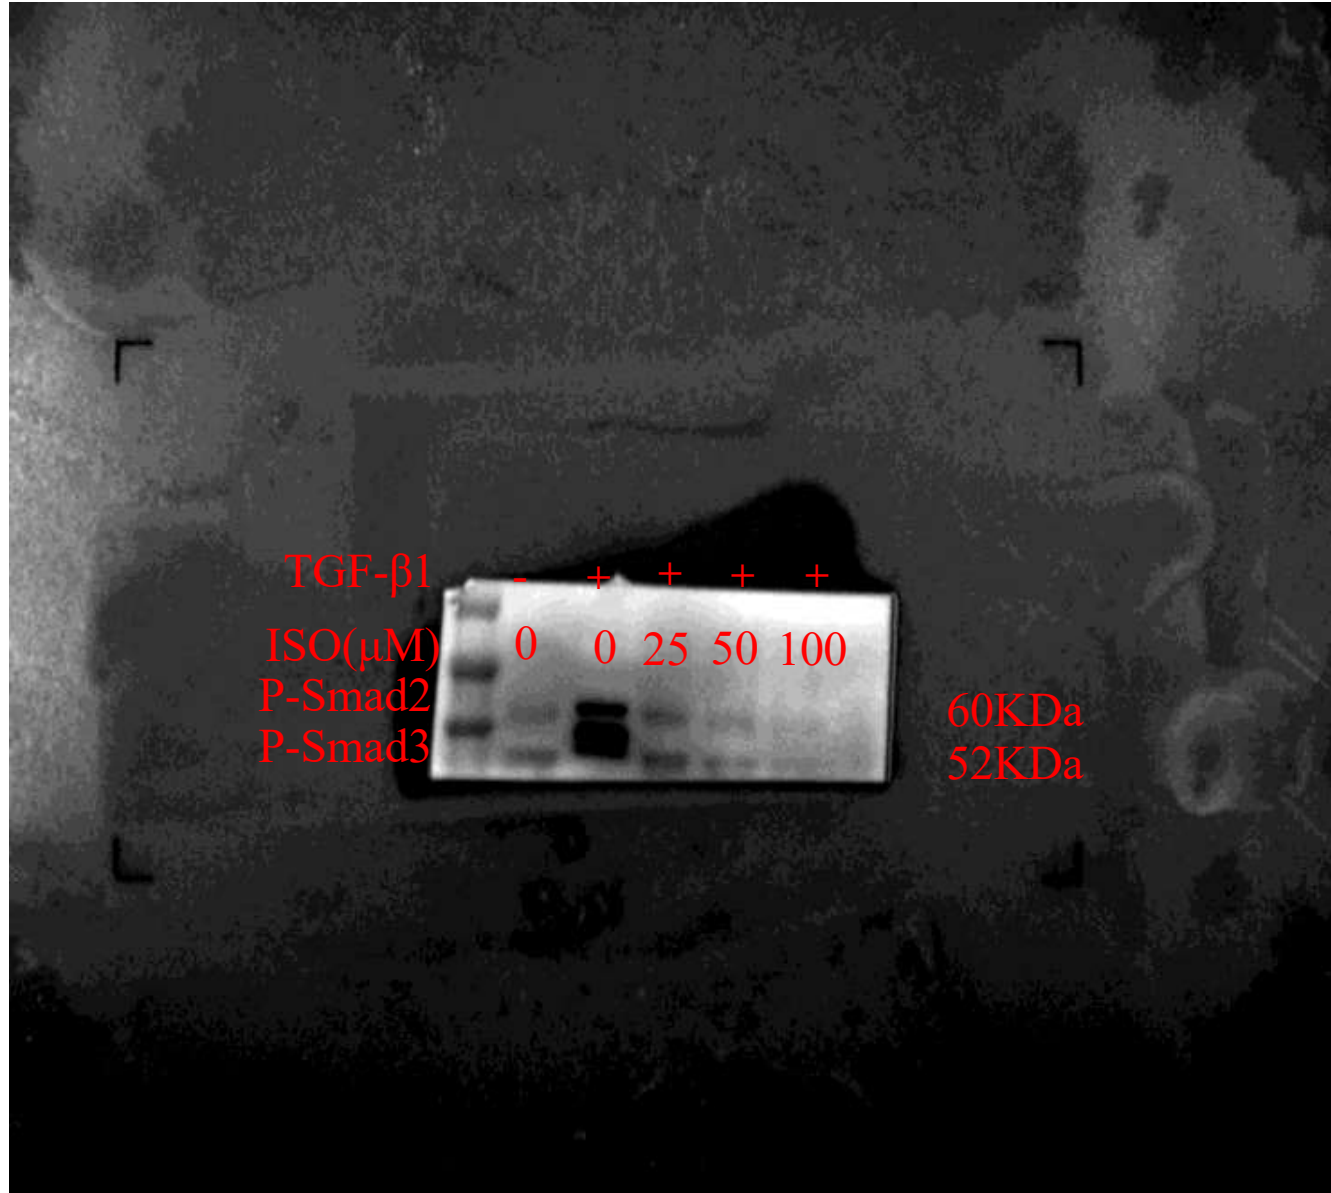

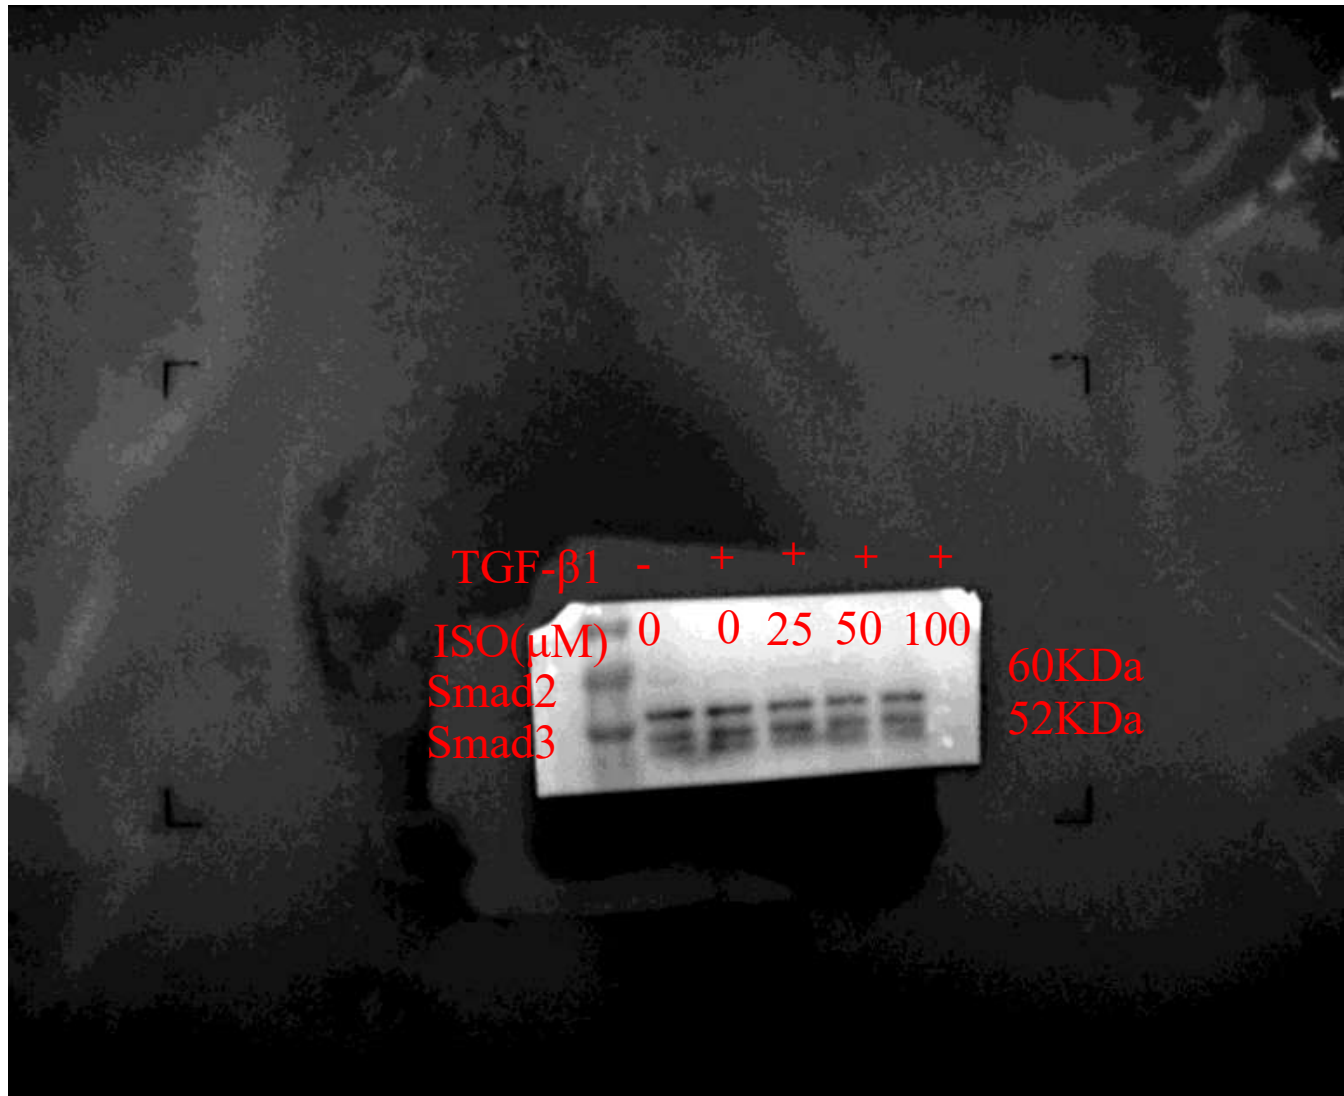

|                |   |   |    |    |     |
|----------------|---|---|----|----|-----|
| TGF- $\beta$ 1 | - | + | +  | +  | +   |
| ISO( $\mu$ M)  | 0 | 0 | 25 | 50 | 100 |
| COL III        |   |   |    |    |     |

172KDa

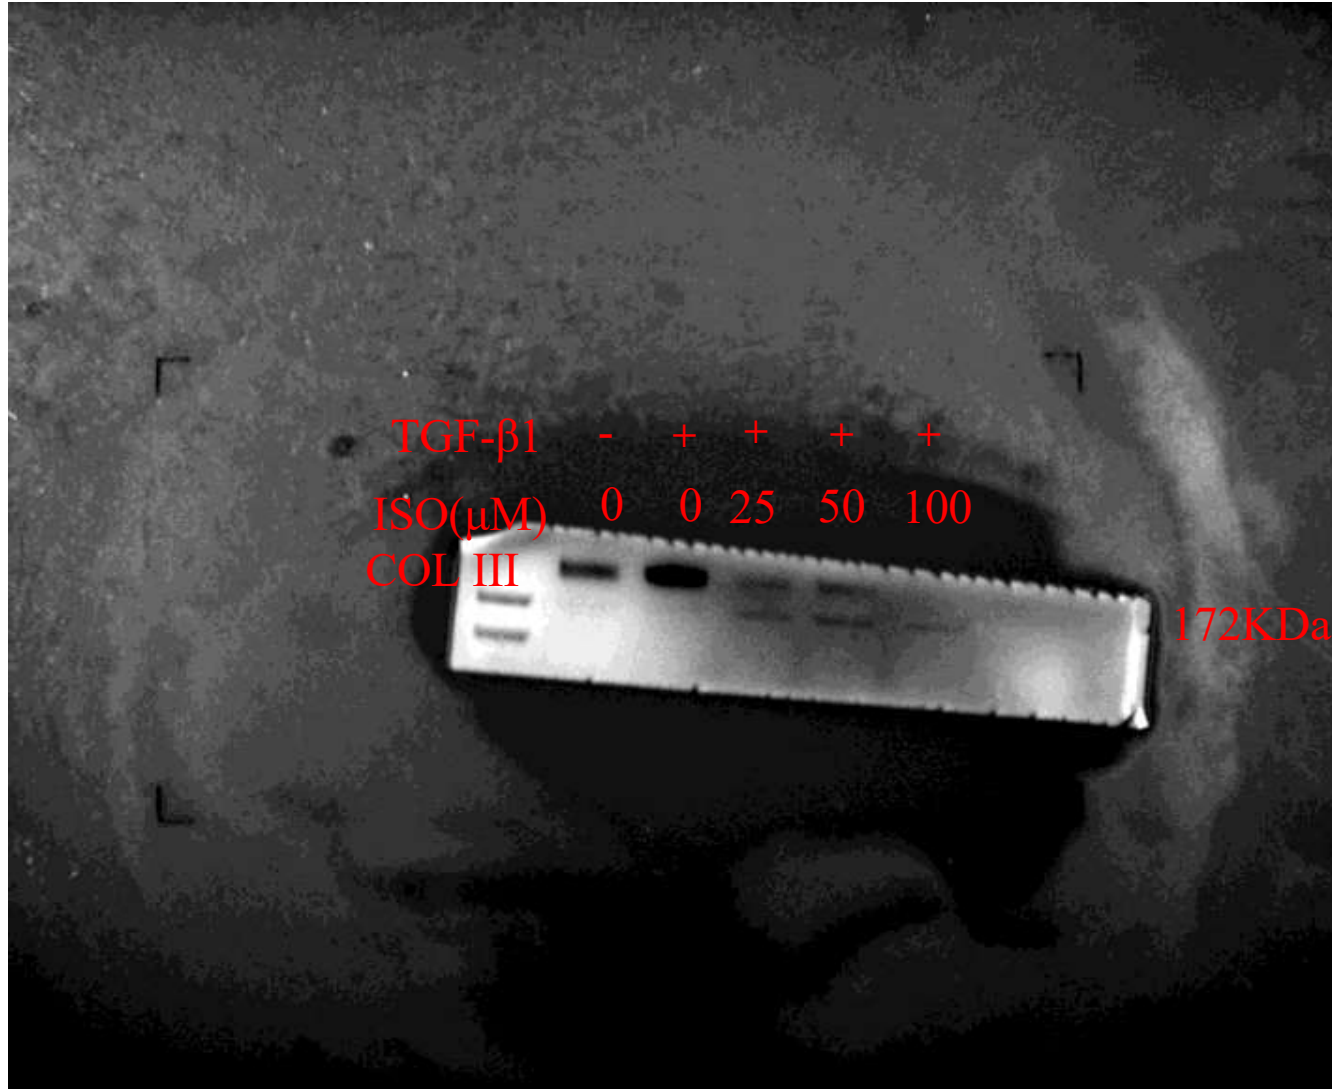

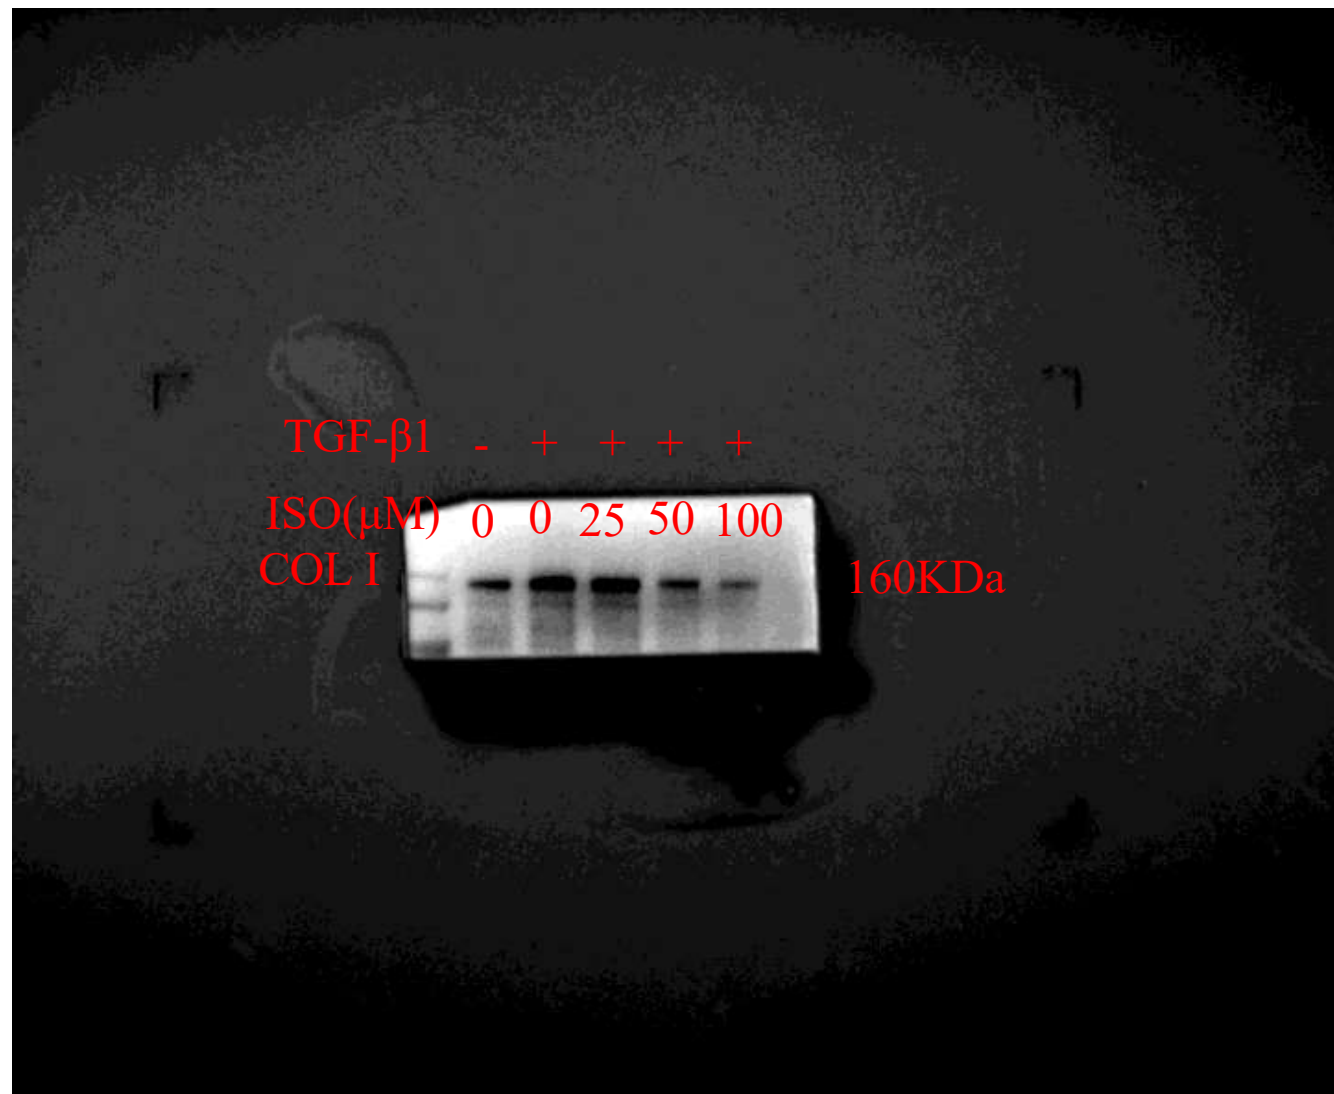

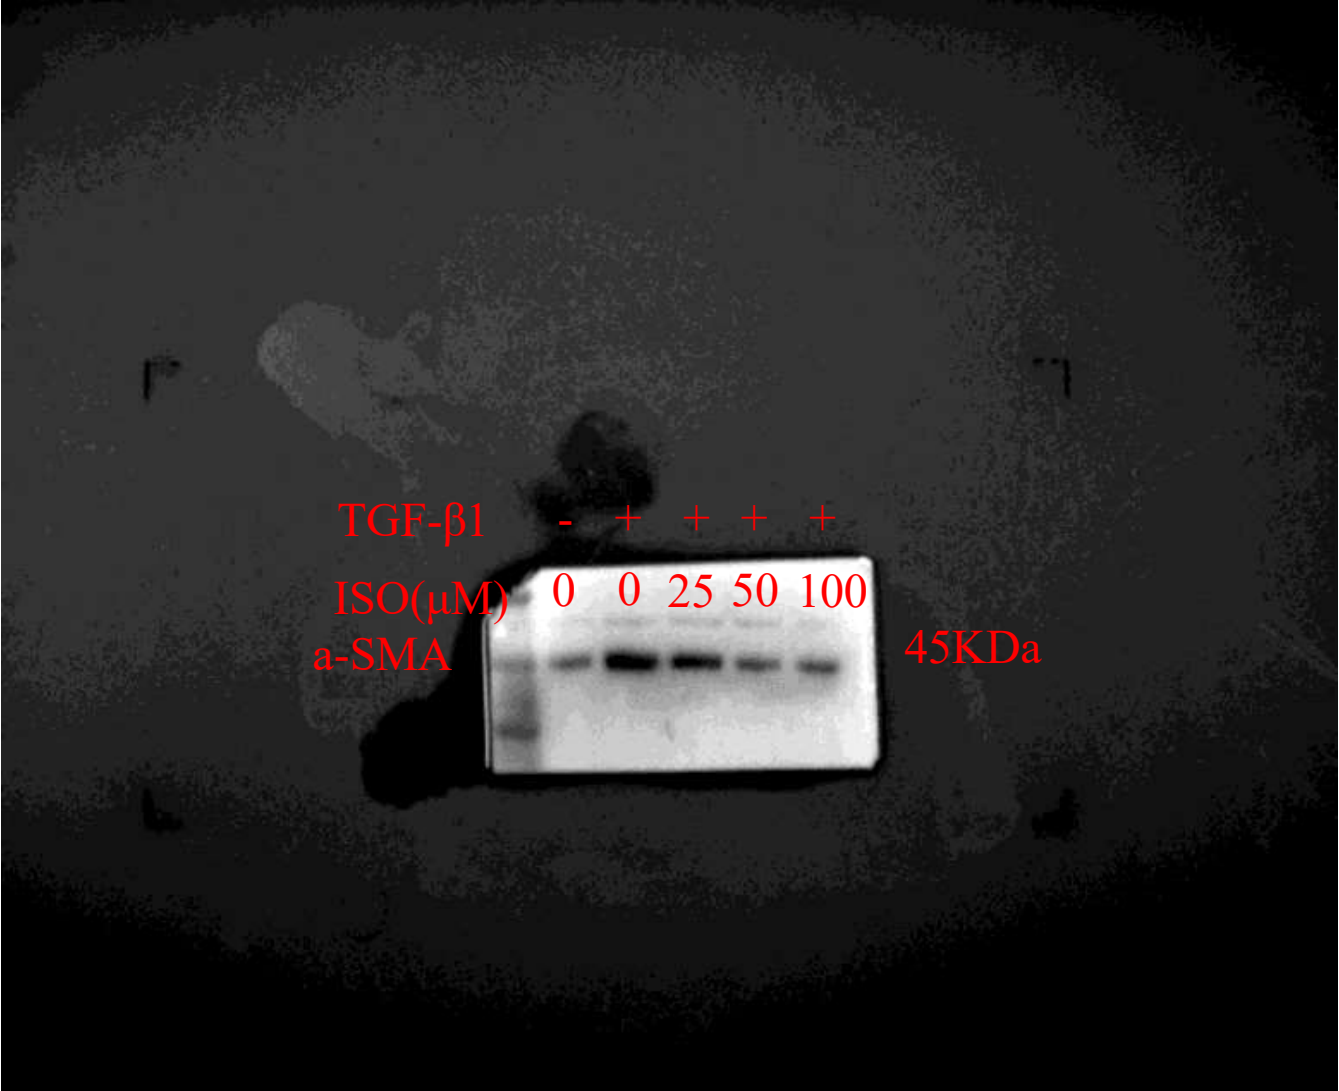



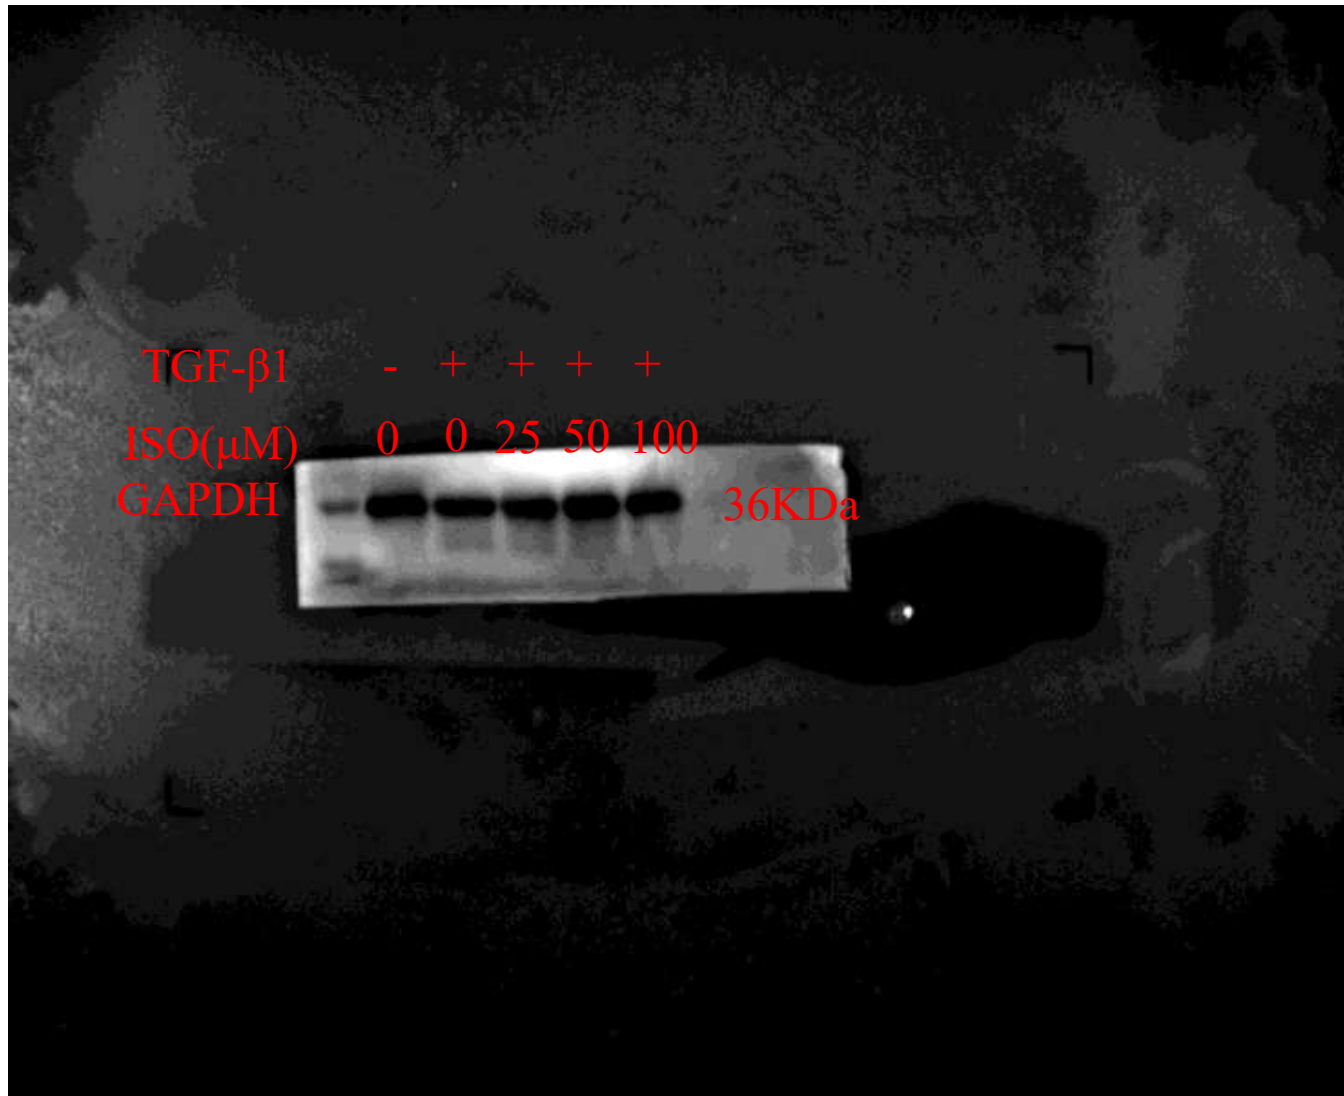

**Figure 6. ISO inhibited ECM production by suppressing the TGF- $\beta$ 1/CREB3L1 signaling pathway.**

B. The protein levels of CREB3L1 and cleaved CREB3L1 detected by Western blotting after HSFBs were treated with ISO (0, 25, 50, 100  $\mu$ M) + TGF- $\beta$ 1 (0, 10 ng/mL) for 48 h, and the quantification of the protein levels normalized to the GAPDH level.

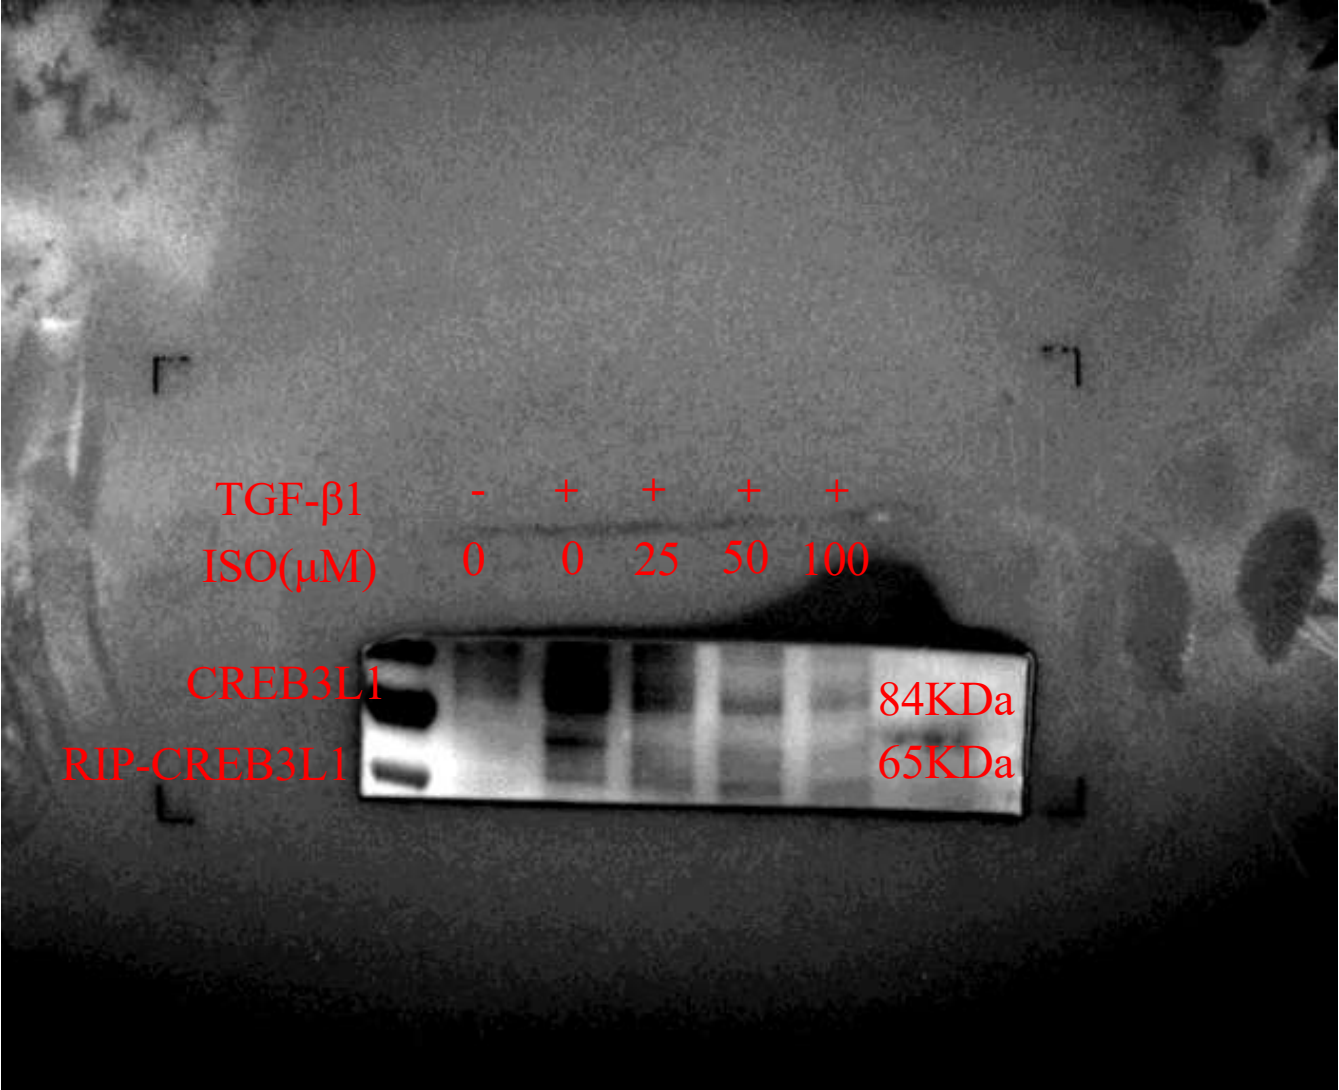

|                |   |   |    |    |     |
|----------------|---|---|----|----|-----|
| TGF- $\beta$ 1 | - | + | +  | +  | +   |
| ISO( $\mu$ M)  | 0 | 0 | 25 | 50 | 100 |
| GAPDH          |   |   |    |    |     |

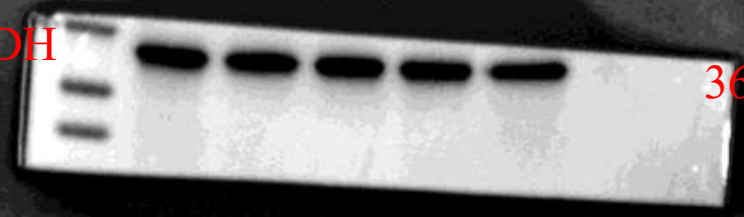

36KDa

C. The protein levels of CREB3L1 detected by Western blotting after HSFBs were transfected with CREB3L1 siRNAs (si-CREB3L1#1, si-CREB3L1#2, and si-CREB3L1#3) and the quantification of the protein levels normalized to GAPDH.

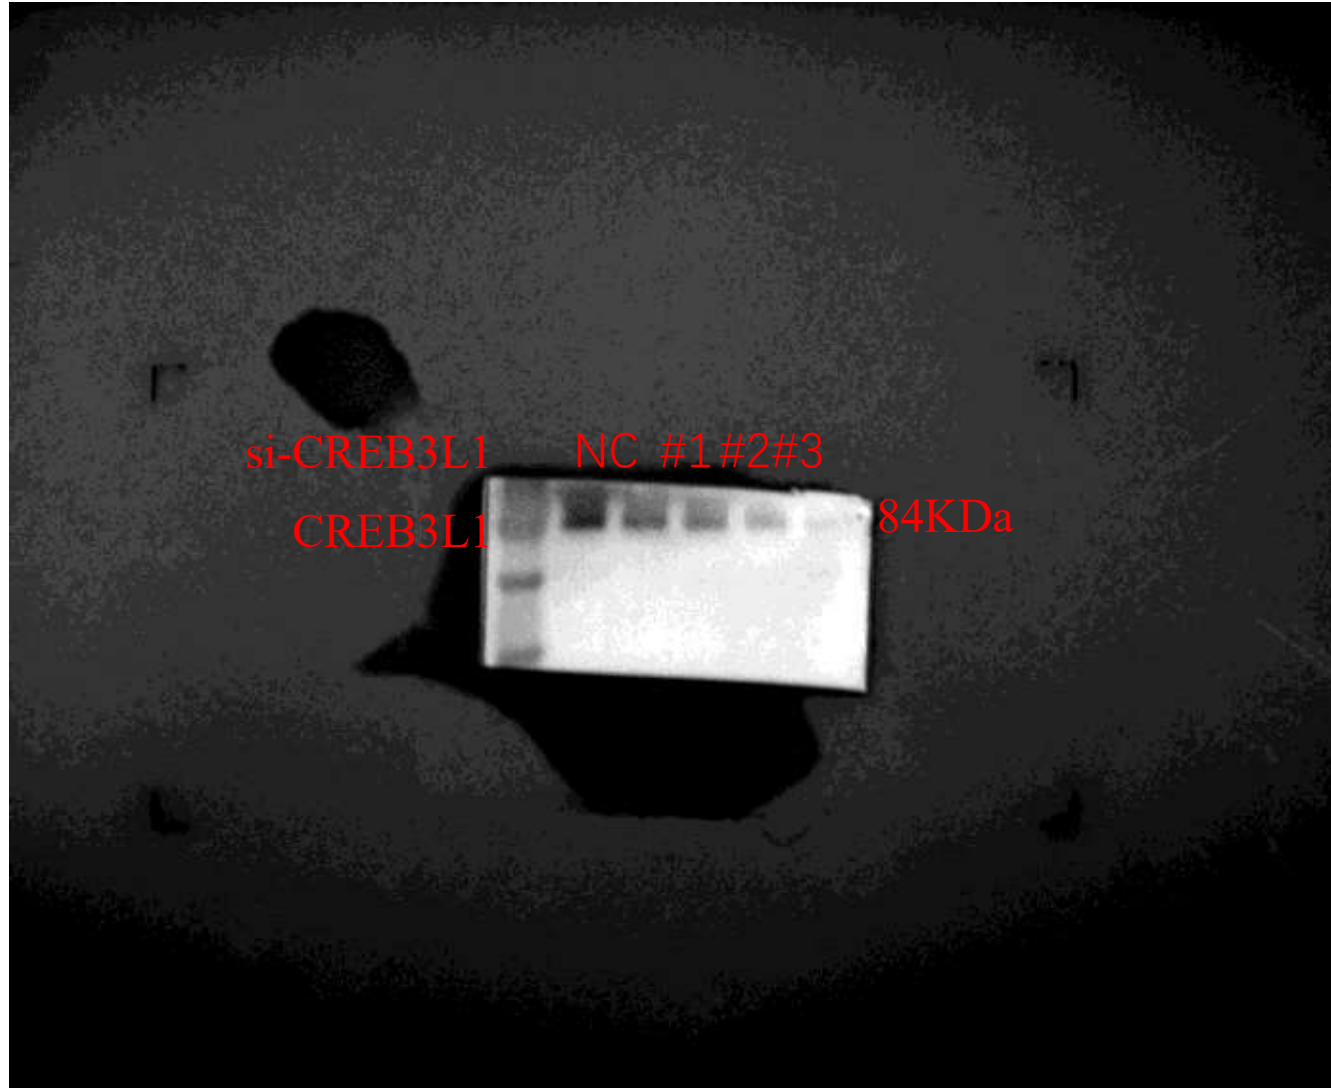

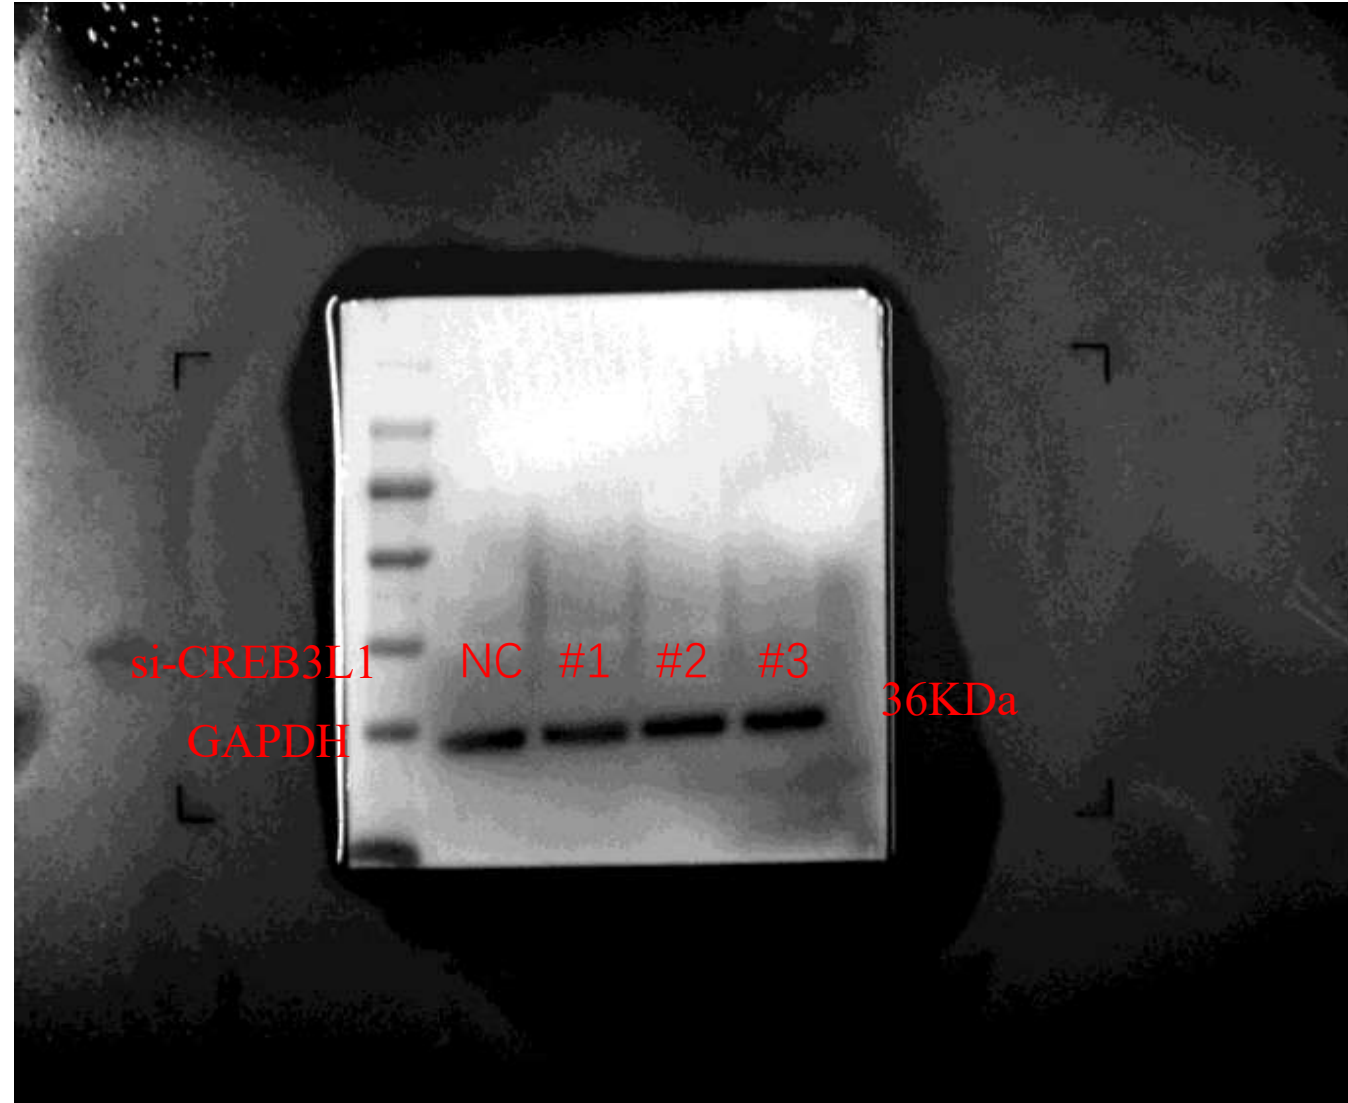

D. The protein levels of phosphorylated and total Smad2/3, COL I, COL III, and  $\alpha$ -SMA in HFSBs treated with CREB3L1 siRNA or CREB3L1 siRNA combined with ISO (50  $\mu$ M) for 48 h and the quantification of protein levels normalized to GAPDH. In this experiment, TGF- $\beta$ 1 (10 ng/mL) was added to induce the phosphorylation of Smad2/3 and the expression of COL I, COL III, and  $\alpha$ -SMA.

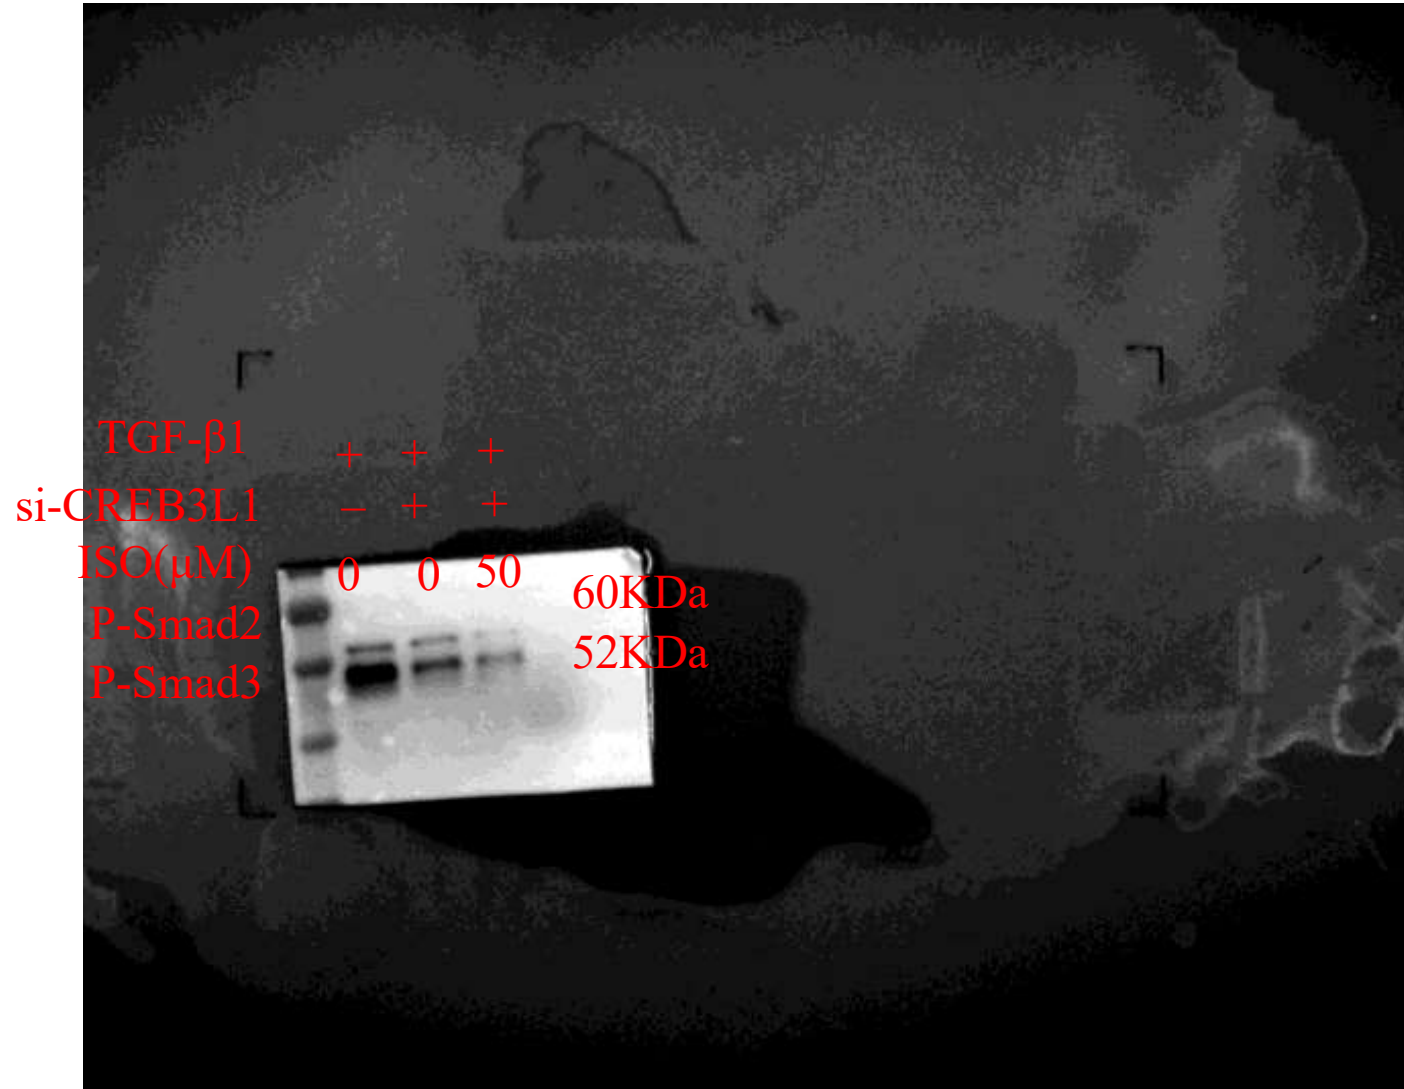

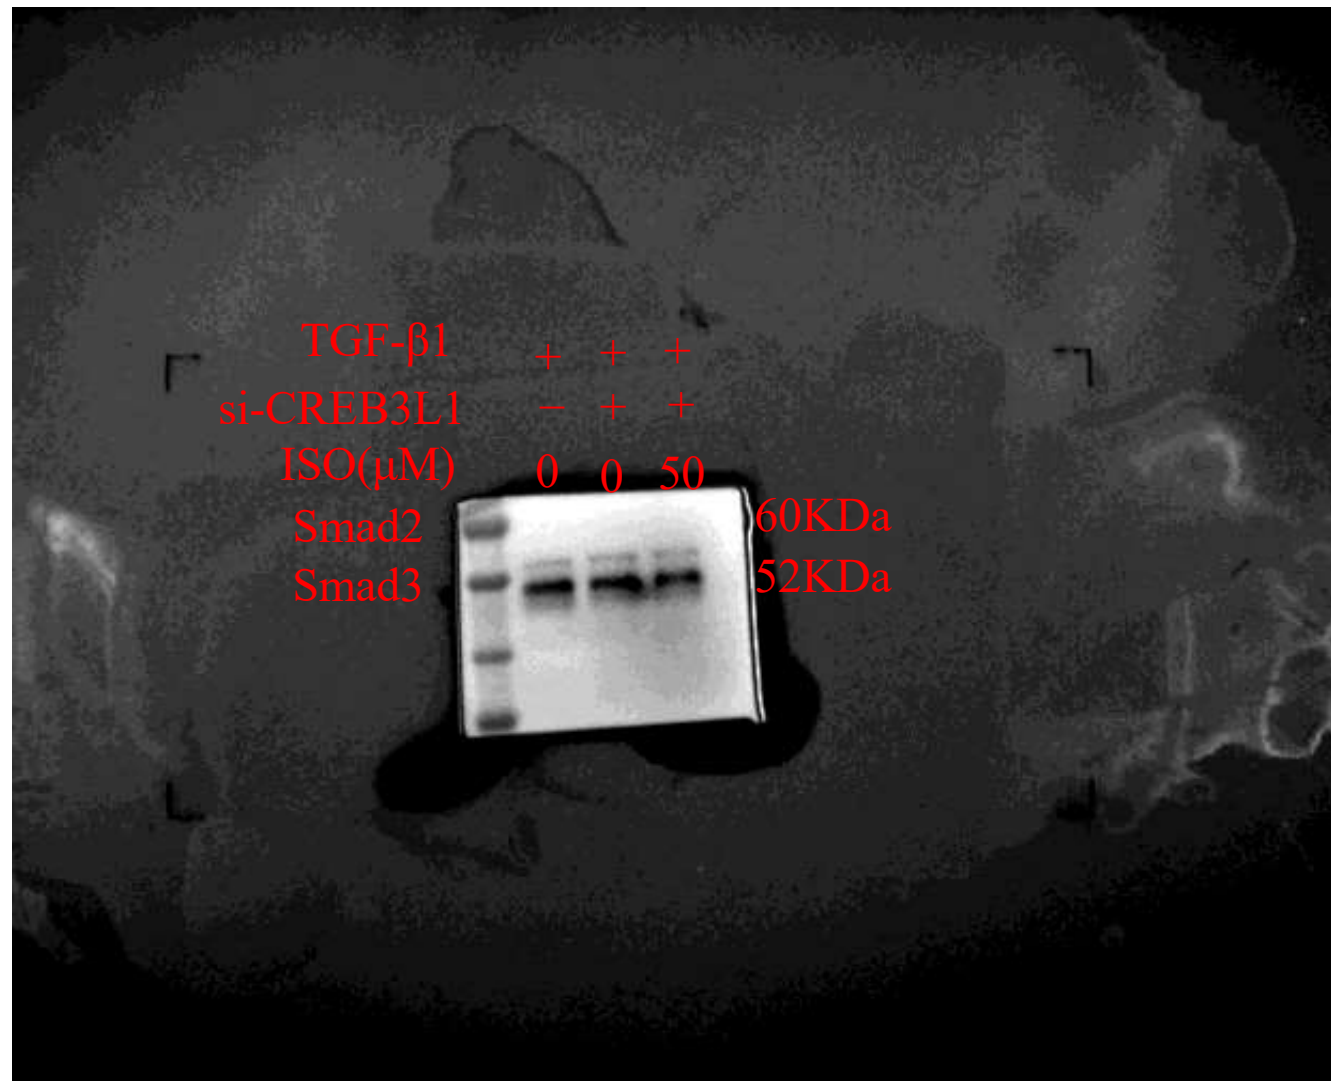

|                |   |   |    |
|----------------|---|---|----|
| TGF- $\beta$ 1 | + | + | +  |
| si-CREB3L1     | - | + | +  |
| ISO( $\mu$ M)  | 0 | 0 | 50 |
| COL III        |   |   |    |

172KDa

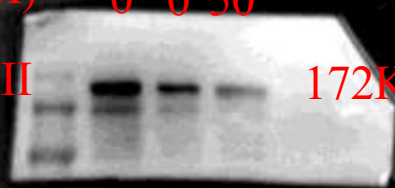



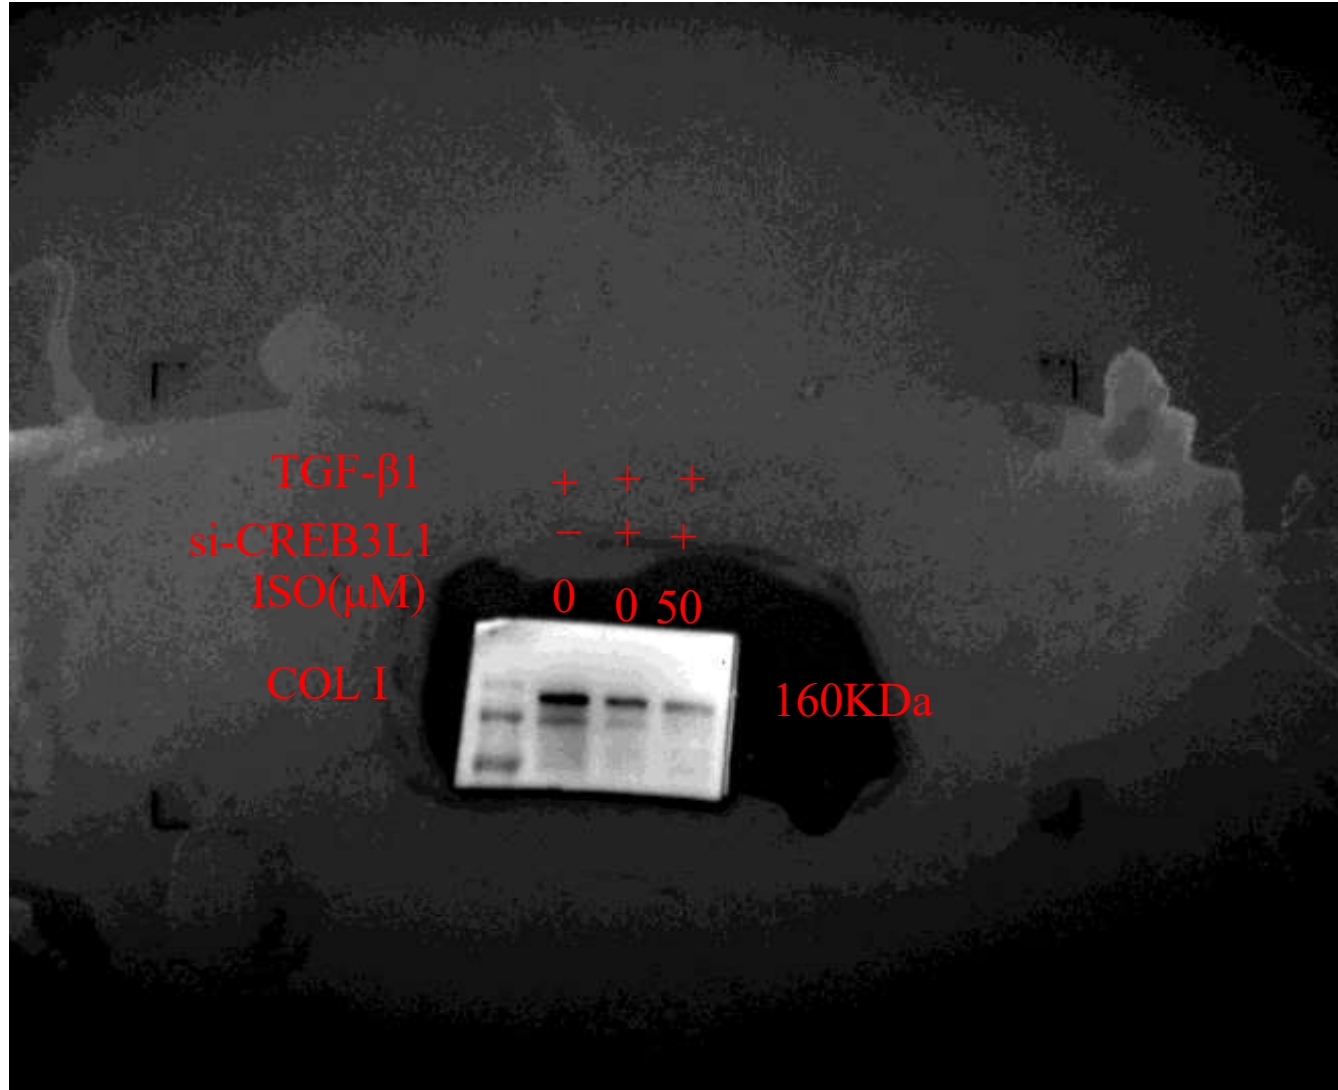

TGF- $\beta$ 1 + + +  
si-CREB3L1 - + +  
ISO( $\mu$ M) 0 0 50

$\alpha$ -SMA

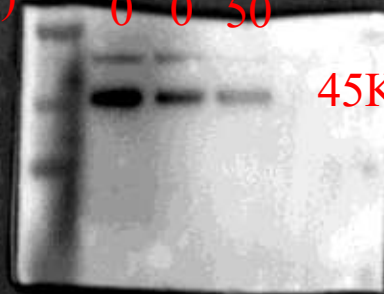

45KDa

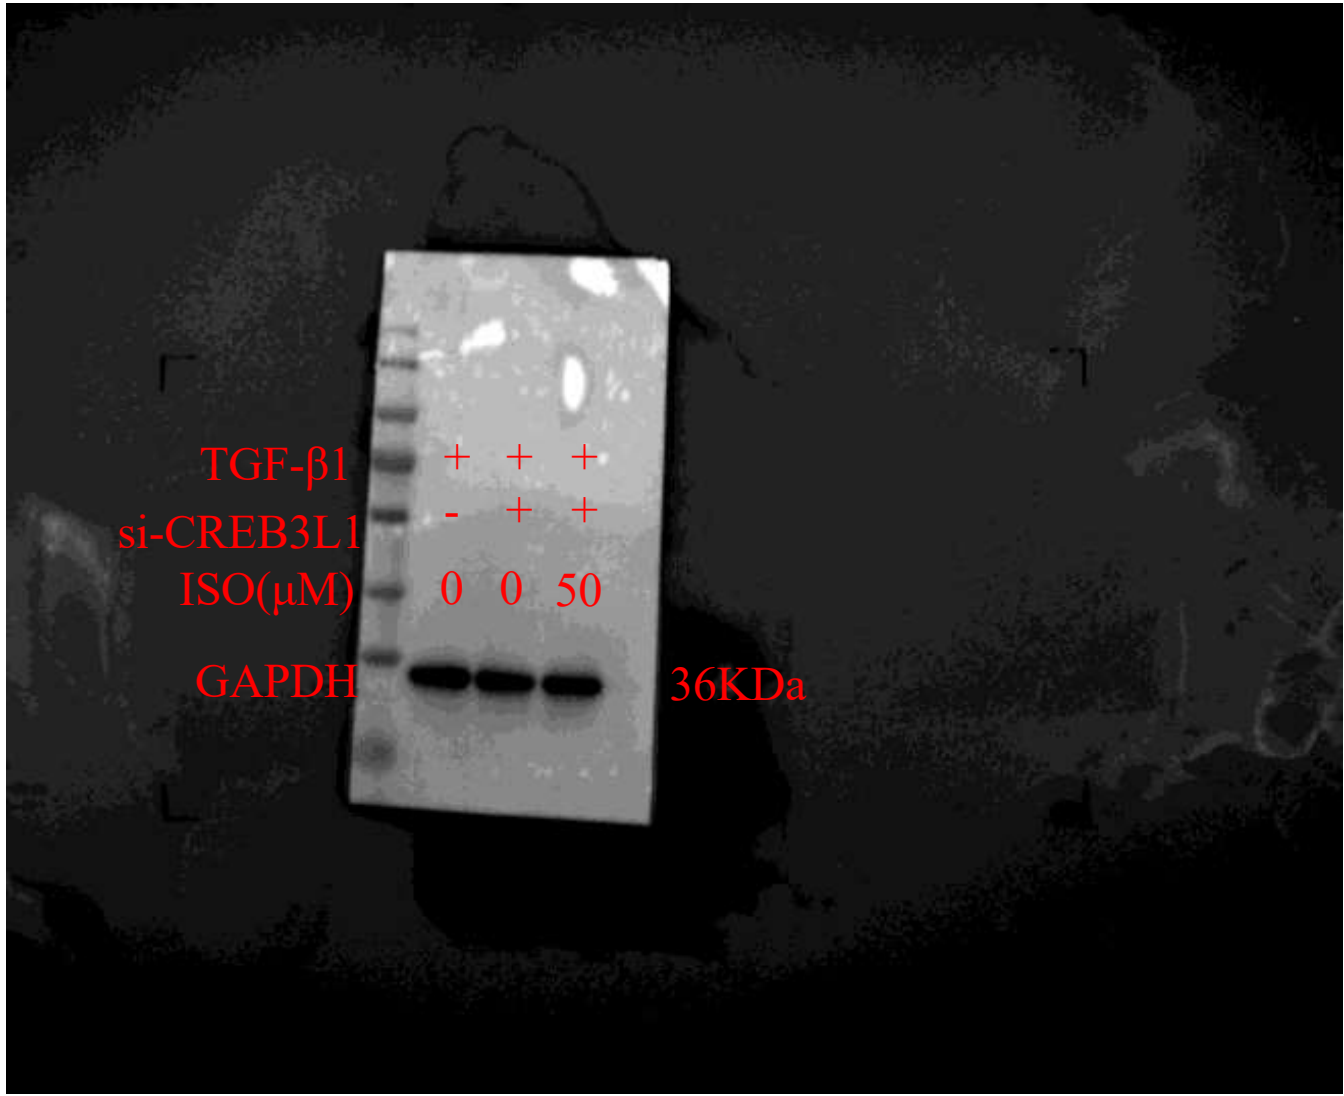

Supplement: mmc1.pdf [file mmc1.pdf]
